# Supplementary material for: Purpose in life (Ikigai) and employment status in relation to cardiovascular mortality: the Japan Collaborative Cohort Study
Source: PubMed Central journal article supplement — BMJ Open. 2022 Oct 10;12(10):e059725. doi: 10.1136/bmjopen-2021-059725 (PMC9557793; doi:10.1136/bmjopen-2021-059725), 2022-10-10
Supplement: bmjopen-2021-059725.draft_revisions.pdf [file bmjopen-2021-059725.draft_revisions.pdf]

# BMJ Open

BMJ Open is committed to open peer review. As part of this commitment we make the peer review history of every article we publish publicly available.

When an article is published we post the peer reviewers' comments and the authors' responses online. We also post the versions of the paper that were used during peer review. These are the versions that the peer review comments apply to.

The versions of the paper that follow are the versions that were submitted during the peer review process. They are not the versions of record or the final published versions. They should not be cited or distributed as the published version of this manuscript.

BMJ Open is an open access journal and the full, final, typeset and author-corrected version of record of the manuscript is available on our site with no access controls, subscription charges or pay-per-view fees (<http://bmjopen.bmj.com>).

If you have any questions on BMJ Open's open peer review process please email [info.bmjopen@bmj.com](mailto:info.bmjopen@bmj.com)

# BMJ Open

## Purpose in life (Ikigai) and employment status in relation to cardiovascular mortality

|                               |                                                                                                                                                                                                                                                                                                                                                                                                                                                                                                                                                                                                      |
|-------------------------------|------------------------------------------------------------------------------------------------------------------------------------------------------------------------------------------------------------------------------------------------------------------------------------------------------------------------------------------------------------------------------------------------------------------------------------------------------------------------------------------------------------------------------------------------------------------------------------------------------|
| Journal:                      | <i>BMJ Open</i>                                                                                                                                                                                                                                                                                                                                                                                                                                                                                                                                                                                      |
| Manuscript ID                 | bmjopen-2021-059725                                                                                                                                                                                                                                                                                                                                                                                                                                                                                                                                                                                  |
| Article Type:                 | Original research                                                                                                                                                                                                                                                                                                                                                                                                                                                                                                                                                                                    |
| Date Submitted by the Author: | 09-Dec-2021                                                                                                                                                                                                                                                                                                                                                                                                                                                                                                                                                                                          |
| Complete List of Authors:     | Miyazaki, Junji; Osaka University, Public Health, Department of Social Medicine, Graduate School of Medicine<br>Shirai, Kokoro; Osaka University, Public Health, Department of Social Medicine, Graduate School of Medicine<br>Kimura, Takashi; Hokkaido University, Department of Public Health<br>Ikehara, Satoyo; Osaka University, Public Health, Department of Social Medicine, Graduate School of Medicine<br>Tamakoshi, Akiko; Hokkaido University, Department of Public Health<br>Iso, Hiroyasu; Osaka University, Public Health, Department of Social Medicine, Graduate School of Medicine |
| Keywords:                     | EPIDEMIOLOGY, OCCUPATIONAL & INDUSTRIAL MEDICINE, SOCIAL MEDICINE, STROKE MEDICINE, Coronary heart disease < CARDIOLOGY                                                                                                                                                                                                                                                                                                                                                                                                                                                                              |
|                               |                                                                                                                                                                                                                                                                                                                                                                                                                                                                                                                                                                                                      |

SCHOLARONE™  
Manuscripts

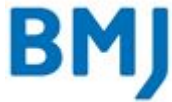

I, the Submitting Author has the right to grant and does grant on behalf of all authors of the Work (as defined in the below author licence), an exclusive licence and/or a non-exclusive licence for contributions from authors who are: i) UK Crown employees; ii) where BMJ has agreed a CC-BY licence shall apply, and/or iii) in accordance with the terms applicable for US Federal Government officers or employees acting as part of their official duties; on a worldwide, perpetual, irrevocable, royalty-free basis to BMJ Publishing Group Ltd ("BMJ") its licensees and where the relevant Journal is co-owned by BMJ to the co-owners of the Journal, to publish the Work in this journal and any other BMJ products and to exploit all rights, as set out in our [licence](#).

The Submitting Author accepts and understands that any supply made under these terms is made by BMJ to the Submitting Author unless you are acting as an employee on behalf of your employer or a postgraduate student of an affiliated institution which is paying any applicable article publishing charge ("APC") for Open Access articles. Where the Submitting Author wishes to make the Work available on an Open Access basis (and intends to pay the relevant APC), the terms of reuse of such Open Access shall be governed by a Creative Commons licence – details of these licences and which [Creative Commons](#) licence will apply to this Work are set out in our licence referred to above.

Other than as permitted in any relevant BMJ Author's Self Archiving Policies, I confirm this Work has not been accepted for publication elsewhere, is not being considered for publication elsewhere and does not duplicate material already published. I confirm all authors consent to publication of this Work and authorise the granting of this licence.

**TITLE**

Purpose in life (*Ikigai*) and employment status in relation to cardiovascular mortality

**AUTHOR NAMES AND AFFILIATIONS**

Junji Miyazaki<sup>1</sup>, Kokoro Shirai<sup>1</sup>, Takashi Kimura<sup>2</sup>, Satoyo Ikehara<sup>1</sup>, Akiko Tamakoshi<sup>2</sup>, Hiroyasu Iso<sup>\*1</sup>

<sup>1</sup> Public Health, Department of Social Medicine, Osaka University Graduate School of Medicine, 2-2 Yamadaoka, Suita, Osaka, Japan

<sup>2</sup> Department of Public Health, Faculty of Medicine, Hokkaido University, Kita 8, Nishi 5, Kita-ku, Sapporo, Japan

**CORRESPONDING AUTHOR**

\* Correspondence to Hiroyasu Iso Public Health, Department of Social Medicine, Osaka University Graduate School of Medicine, 2-2 Yamadaoka, Suita, Osaka 565-0871, Japan. E-mail iso@pbhel.med.osaka-u.ac.jp

**KEYWORDS**

purpose in life (*Ikigai*), employment status, cardiovascular disease, stroke, coronary heart disease, mortality, prospective study

**NUMBER OF TABLES**

One figure and four tables

**ORCID**

ID: 0000-0003-3634-6401

1  
2  
3  
4  
5  
6  
7  
8  
9  
10  
11  
12  
13  
14  
15  
16  
17  
18  
19  
20  
21  
22  
23  
24  
25  
26  
27  
28  
29  
30  
31  
32  
33  
34  
35  
36  
37  
38  
39  
40  
41  
42  
43  
44  
45  
46  
47  
48  
49  
50  
51  
52  
53  
54  
55  
56  
57  
58  
59  
60

**WORD COUNT**

2, 675 words (without references)

For peer review only

## Abstract

Objectives: To investigate if having a purpose in life (*Ikigai*) is associated with cardiovascular mortality and assess whether the association varies by employment status.

Design: Prospective cohort study.

Setting: The Japan Collaborative Cohort Study (JACC Study, 1988-2009).

Participants: Cohort analyses included 29 517 men and 41 984 women (40-79 years at baseline 1988-90) from the JACC Study, free of cardiovascular disease and cancer at baseline.

Primary outcome measures: The association between purpose in life (*Ikigai*) and the risk of mortality from CVD by employment status was examined by hazard ratios (HRs) using a Cox proportional hazards model, adjusting cardiovascular risk factors.

Results: During the median 19.1-year follow-up, there were 4 680 deaths (men 2 393 and women 2 287) from CVD, including 2 053 (1 047 and 1 006) from total stroke, 716 (398 and 318) from ischemic stroke, 739 (344 and 395) from hemorrhagic stroke, 975 (550 and 425) from coronary heart disease (CHD), and 792 (361 and 431) from heart failure. Compared with unemployed people with low *Ikigai*, those with moderate and high *Ikigai* had a lower risk of CVD mortality. Multivariable HRs (95% CIs) were 0.74 (0.57 to 0.97), 0.69 (0.52 to 0.93); *P* for trend = 0.044, respectively in men, and 0.78 (0.64 to 0.95), 0.77 (0.61 to 0.97); *P* for trend = 0.039 in women. Such an inverse association was more evident for men than women and remained even after excluding early deaths that occurred within five years of the baseline survey. The inverse association with *Ikigai* was observed to remain statistically significant for total stroke and CHD after adjustment for CVD risk factors.

Conclusion: Having *Ikigai* was associated with a lower risk of CVD mortality for all study participants, especially unemployed men and women.

## Article Summary

### Strengths and limitations of this study

The strength of this study is that it is a population-based cohort study with a large sample size and a long follow-up period.

The association between the level of purpose in life (*Ikigai*) and the risk of cardiovascular mortality was assessed by stratification of employment status.

The limitation of this study is that psychological factors such as "the purpose of life (*Ikigai*)" were assessed using a self-administered single-item questionnaire.

An analysis that censored people who died or moved during the first five years of follow-up and examined possible adverse causal relationships from CVD development did not change the conclusions of this study.

## Introduction

Recently, there has been growing evidence that positive psychological factors, such as life satisfaction, happiness, life enjoyment, optimism, and purpose in life have been associated with favorable health outcomes, including reduced risk of cardiovascular disease, the activities of daily living, cognitive impairment, and all-cause mortality<sup>1-6</sup>. A meta-analysis of 17 studies (mainly from the United States, Canada, and Europe) reported that psychological factors, such as meaning in life, purpose of life, life satisfaction, positive affect, and self-esteem, were considered essential components of well-being<sup>7</sup>. In another meta-analysis, high life purpose was associated with a 17% lower risk of all-cause mortality and cardiovascular events such as myocardial infarction, cardiac death, and stroke, even after adjusting for sociodemographic, health, and functional status<sup>8</sup>.

"*Ikigai*" is a Japanese concept similar to "purpose in life," "meaning of life," "life worth living," and "reason to live," which can be translated as "that which most makes one's life seem worth living"<sup>9</sup>. In Japanese, *Ikigai* is defined as a comprehensive concept related to life satisfaction, self-esteem, self-efficacy, morale, and cognitive evaluation of the meaning of one's life<sup>10</sup>. *Ikigai* involves more than enjoyment, pleasure, or happiness and provides significance for one's value in life, including subjective motivation for a living<sup>11</sup>. Thus, *Ikigai* is considered an essential positive psychological factor rooted in Japanese culture. In a previous prospective cohort study over 7-years' follow-up on 43 391 Japanese adults, the presence of a sense of *Ikigai* was associated with decreased risk of all-cause and cardiovascular mortality among middle-aged and elderly Japanese men and women<sup>12</sup>. Unemployment has been shown to affect health adversely<sup>13</sup>. A meta-analysis of 42 cross-sectional and prospective cohort studies providing data on more than 20 million people showed that unemployment was associated with an increased risk of all-cause mortality, with a 63% higher risk for those who experienced unemployment than those who did not<sup>14</sup>. Some studies showed an increased incidence of cardiovascular events such as coronary heart disease (CHD) and stroke associated with unemployment status<sup>15-17</sup>. A study based on a population-wide dataset, consisting of a record linkage between 3 084 137 Belgian individuals aged 25 to 59 years at the 2001 census, has shown that unemployment status was associated with health problems such as cardiovascular, endocrine, and psychiatric disorders<sup>18</sup>. Many studies have suggested that poor health is a direct



1  
2  
3 or indirect consequence of unemployment and that this causal relationship is mediated by health behaviors such  
4 as tobacco or alcohol consumption<sup>19-22</sup>. Unemployed people were more likely to have higher stress and lower  
5 psychological well-being, which may also lead to a decline in physical health<sup>23</sup>.  
6  
7  
8  
9

10 A panel study of 6 739 US adults (mean age 68.8 years) over four years showed that a higher purpose in  
11 life is associated with lower mortality from stroke, adjusted for age, gender, race/ethnicity, and socioeconomic  
12 status<sup>24</sup>. In a study of 230 retired Japanese men and 98 women (mean age 65.5 years) examining the  
13 relationship between work and *Ikigai*, men who were actively engaged in work were associated with greater  
14 well-being than inactive<sup>11</sup>. However, no study has focused on the impact of *Ikigai* and mortality risk by  
15 employment status to our knowledge. We hypothesized that *Ikigai* has a positive impact on cardiovascular  
16 health and examined effect modification of employment status considering the effect of having *Ikigai* is  
17 prominent even under an unemployed situation. We aimed to assess the impact of *Ikigai* and employment status  
18 on cardiovascular mortality in Japanese, using 19.1 years follow-up of a large-scale prospective cohort study.  
19  
20  
21  
22  
23  
24  
25  
26  
27  
28  
29  
30  
31  
32

## 33 **Methods**

### 34 **Study population**

35  
36 The Japan Collaborative Cohort Study for the Evaluation of Cancer Risks (JACC study) was enrolled  
37 between 1988 and 1990 in 45 areas in Japan. Participants were required to conduct self-administered  
38 questionnaires about their lifestyle and previous medical history concerning cardiovascular disease (CVD) and  
39 cancer at baseline. The details of the study procedure are described elsewhere<sup>25</sup>. Briefly, a total of 1 105 85  
40 subjects (46 395 men and 64 190 women) aged 40 to 79 years old participated in the JACC study at baseline  
41 survey. Among the participants, 7 692 were excluded due to a past history of CVD or cancer at baseline. An  
42 additionally, we excluded 31 392 excluded for 25 730 participants in areas with no questions about *Ikigai* and 5  
43 662 participants who lacked information about *Ikigai*. Finally, 71 501 subjects (29 517 men and 41 984 women)  
44 were eligible for inclusion in the analyses (figure 1). Prior to the completion of the questionnaire, the participants  
45 were provided informed consent to be involved in this epidemiological study. Individual informed consent was  
46  
47  
48  
49  
50  
51  
52  
53  
54  
55  
56  
57  
58  
59  
60

1  
2  
3 obtained from each participant in 36 out of the 45 study areas (written consent in 35 areas and oral consent in 1  
4 area). In the remaining nine areas, group consent was obtained from each community representative. Ethical  
5 approval for the present study was given by Osaka University and Hokkaido University.  
6  
7  
8  
9  
10

### 11 **Mortality surveillance**

12  
13  
14 The date and cause of death for participants were determined by reviewing all death certificates from each area.  
15  
16 According to the International Classification of Diseases, 10th revision, cause-specific mortality was defined  
17 within total CVD mortality (I01 to I99). From baseline until December 31, 2009, a total of 15 801 participants  
18 were censored because of death, and 3986 were censored because they moved out of their original residential  
19 area; follow-up was terminated at the end of 1999 (four areas), 2003 (four areas), and 2008 (two areas). The  
20 median follow-up period was 19.1 years (interquartile range, 10.4 - 20.7).  
21  
22  
23  
24  
25  
26  
27  
28  
29

### 30 **Baseline Measurement**

31  
32  
33 At baseline, we used a self-administered questionnaire to obtain information on age, body mass index (BMI)  
34 (calculated by dividing body weight in kilograms by height squared in meters), smoking status, alcohol  
35 consumption, sleep duration, walking time per day, sports activity time per week, education level, marital status,  
36 employment status, and psychological conditions such as *Ikigai*, perceived mental stress, sense of life  
37 enjoyment, and medical history of hypertension and diabetes mellitus. *Ikigai* was assessed using the question  
38 "How much '*Ikigai*' do you feel in your daily life?" and responses were assessed using a four-point Likert scale:  
39 "low," "moderate," "high," and "very high." We collapsed "very high" into "high" for the analyses, as did  
40 previous studies<sup>26,27</sup>, and the three categories for perceived levels of *Ikigai* were "low," "moderate," and "high."  
41  
42 Other psychological conditions were evaluated by single-item questions using four points Likert  
43 scale.  
44  
45  
46  
47  
48  
49  
50  
51  
52  
53  
54  
55  
56  
57

### 58 **Statistical analysis**

1  
2  
3 We compared sex-specific and age-adjusted mean or prevalence of baseline variables of risk factors for CVD  
4 according to the perceived level of *Ikigai* among participants using analysis of covariance or chi-square test.  
5  
6  
7  
8 The *P*-value of the covariate for trends across the perceived level of *Ikigai* was calculated using the mean value  
9  
10 of each variable and the median value among the categories. For each participant, we calculated the person-years  
11  
12 of follow-up from baseline in 1988 and 1990 to the first endpoint of death, moving from the community, or the  
13  
14 end of 2009. Mortality rates for CVD were estimated according to the perceived levels of *Ikigai*.  
15  
16

17 In the analysis, we calculated the association between *Ikigai* and risk of mortality from CVD by sex,  
18  
19 with hazard ratios (HRs) and 95% confidence intervals (CIs), using the Cox proportional hazards model. The  
20  
21 analysis was performed adjusted for age and then for other potential confounders: BMI (< 18.5, 18.5 to  
22  
23 <25.0, 25.0 to 30.0, 30.0 to 35.0, and  $\geq 35.0$  kg/m<sup>2</sup>), smoking status (never, ex-smoker, and current  
24  
25 smoker), alcohol consumption (never, ex-drinker, 1–20 and  $\geq 20.0$  g ethanol/ day), sports activity time per week  
26  
27 (almost never, 1–2, 3–4 and  $\geq 5$  h/week), walking time per day (almost never, 0.5, 0.6–0.9, and  $\geq 1$  h/day),  
28  
29 education level (<13, 13–15, 16–18, and  $\geq 19$  years), marital status (living with a spouse, divorced, bereaved and  
30  
31 single), sleep duration per day (<5, 5, 6, 7, 8, 9 and  $\geq 10$  h/day), perceived mental stress (low, moderate, high,  
32  
33 very high), sense of life enjoyment (always, sometimes, moderate, never) and medical history of hypertension  
34  
35 and diabetes (yes or no). Missing values for these covariates were treated as additional missing categories, and  
36  
37 the model contained these dummy variables. Furthermore, the stratified analysis was performed for six  
38  
39 categories of employment status; employed, self-employed, part-time worker, unemployed, homemaker, and  
40  
41 other. In addition, we conducted a sensitivity analysis to exclude those who died early and those who moved and  
42  
43 were censored in the first five years of follow-up. The following analysis calculated the association between  
44  
45 *Ikigai* and risk of mortality from CVD among unemployed persons by type of CVD: total stroke, ischemic  
46  
47 stroke, hemorrhagic stroke, CHD, and heart failure.  
48  
49  
50  
51  
52  
53

54 Probability values for statistical significance were two-tailed, and a *P*-value <0.05 was regarded as  
55  
56 statistically significant. The statistical analyses were carried out using SAS version 9.4 (SAS Institute Inc., Cary,  
57  
58 NC, USA).  
59  
60

## Patient and Public Involvement

Patients and/or the public were not involved in the design, or conduct, or reporting, or dissemination plans of this research.

## Results

During a follow-up of 1 160 648 person-years, the deaths of 4 680 (men and women: 2 393 and 2 287) due to total CVD were documented. Other deaths from major CVD types were: 2 053 (1 047 and 1 006) from total stroke, 716 (398 and 318) from ischemic stroke, 739 (344 and 395) from hemorrhagic stroke, 975 (550 and 425) from CHD, and 792 (361 and 431) from heart failure.

Table 1 shows the mean values or prevalence of cardiovascular risk factors and health behaviors at baseline according to *Ikigai* level. In both men and women, those with high *Ikigai* tended to have a higher level of the following factors: BMI, self-employed, higher education ( $\geq 16$  years), current alcohol consumption, never smoking, living with a spouse, sports activity ( $\geq 1$ -2 h/week), walking time ( $\geq 1$  h/day), low perceived mental stress and high life enjoyment. Unlike men, women with high *Ikigai* tended to be employed or part-time workers.

Table 2 shows the sex-specific risk of mortality from total CVD according to the level of *Ikigai*, stratified by employment status. Men who had moderate and high *Ikigai* had a lower mortality risk from total CVD than those with low *Ikigai*. Multivariable HRs (95% CIs) were 0.80 (0.68 to 0.93) and 0.74 (0.64 to 0.87);  $P$  for trend  $< 0.001$ , respectively. A similar inverse association was observed among unemployed men. Multivariable HRs (95% CIs) were 0.74 (0.57 to 0.97) and 0.69 (0.52 to 0.93);  $P$  for trend = 0.044, respectively. Women who had moderate and high *Ikigai* levels tended to have lower mortality risk from total CVD than those with low *Ikigai*. However, tests for trend were not statistically significant: multivariable HRs (95% CI) were 0.87 (0.75 to 1.00) and 0.88 (0.76 to 1.03);  $P$  for trend = 0.136, respectively. Among unemployed women, those who had moderate and high *Ikigai* had lower mortality risk from total CVD than those who had low *Ikigai*; tests for trend were statistically significant: multivariable HRs (95% CI) were 0.78 (0.64 to 0.95) and 0.77 (0.61 to

0.97);  $P$  for trend = 0.039, respectively. Table 3 shows the sensitivity analysis in which we censored individuals who died and those who moved during the first five years of follow-up, having already excluded individuals who had an early death. The inverse association was more evident for men than for women and remained even after excluding early deaths that occurred within five years of the baseline survey.

Table 4 shows the risk of mortality from CVD types according to the level of *Ikigai* among unemployed people. Unemployed individuals with high *Ikigai* had lower risk of mortality from total stroke, ischemic and hemorrhagic strokes, CHD, and heart failure than those with low *Ikigai*. After adjusting for CVD risk factors, the inverse association with *Ikigai* remained statistically significant for total stroke and CHD.

## Discussion

Having *Ikigai* was associated with a lower risk of mortality from CVD for all study participants, especially unemployed men and women, in a longitudinal large cohort study. The risk reduction for CVD mortality was observed even after excluding early deaths within five years from the baseline survey. Furthermore, the mortality risk reduction was evident for total stroke and CHD among the unemployed.

The underlying biological mechanisms for the potential preventive effect of *Ikigai* on mortality remained unclear, but some reasons have been addressed. Elevated levels of inflammatory markers such as C-reactive protein and interleukin-6 were associated with an increased risk of mortality<sup>28-30</sup>. A previous study using data from a 10-year panel survey of 985 adults aged 25-74 years residing in the United States showed that people with higher life purpose had lower physiological function scores, calculated by summarizing biomarkers such as resting blood pressure, heart rate variability, low-density lipoprotein cholesterol, glycosylated hemoglobin, plasma C-reactive protein, interleukin-6, urinary measures of epinephrine/norepinephrine and cortisol levels<sup>31</sup>. These may explain how *Ikigai* reduces the risk of mortality in people by lowering the higher stress and inflammatory response.

Two other prospective cohort studies using 9-year follow-up data for 999 persons and 6-year follow-up data for 2 478 persons have demonstrated that the risk reductions by positive psychological factors in all-cause

1  
2  
3 mortality and stroke incidence were stronger in men than in women<sup>32,33</sup>. Another analysis used JACC study data  
4  
5 on 3 004 CVD deaths recorded during the mean 12.5-years follow-up period. It showed that men with higher  
6  
7 *Ikigai* had a reduced risk of CVD mortality after adjusting CVD risk factors, but not stroke and CHD<sup>34</sup>. In the  
8  
9 present study, the inverse association between having *Ikigai* and CVD mortality risk was more pronounced in  
10  
11 men than in women, as in previous studies. However, with a large study population and a more extended follow-  
12  
13 up period than the previous study, it demonstrated that among the unemployed, those with high *Ikigai* had  
14  
15 significantly lower mortality risk from CVD, stroke, and CHD regardless of gender. Our findings showed that  
16  
17 having *Ikigai* can reduce the risk of mortality from stroke and CHD, even among unemployment. A previous  
18  
19 study, which followed 297 construction workers for two years and observed changes in their blood pressure,  
20  
21 showed that the longer the unemployment, the greater the rise in blood pressure. A previous study may imply a  
22  
23 causal link between the increase in blood pressure and the length of unemployment<sup>35</sup>. Positive psychological  
24  
25 factors are associated with a lower prevalence of hypertension<sup>36</sup>. Therefore, *Ikigai* may have reduced the risk of  
26  
27 mortality from stroke by positively affecting blood pressure changes in unemployed people. The better health  
28  
29 impacts of having *Ikigai* may be apparent, even among the unemployed with much evidence of poor health.  
30  
31  
32  
33  
34

35  
36 The present study has several strengths compared to previous studies. First, a population-based cohort  
37  
38 study with a large sample size and a more extended follow-up period allowed us to assess the risk of  
39  
40 cardiovascular mortality according to a level of *Ikigai*, stratified by employment status. Second, we adjusted for  
41  
42 confounding factors, including lifestyle habits, social and psychological factors, and past medical histories such  
43  
44 as hypertension and diabetes mellitus.  
45  
46

47  
48 There were some limitations to our study. First, psychological factors such as *Ikigai* were evaluated by a  
49  
50 self-administered single-item questionnaire. Second, we used mortality as an endpoint, but the onset of CVD  
51  
52 could have induced lifestyle changes and *Ikigai*. There could be reverse causality that the occurrence of disease  
53  
54 or illness had influenced *Ikigai* at baseline. Therefore, we excluded histories of CVD and cancer and conducted a  
55  
56 sensitivity analysis in which individuals who died or moved during the first five years of follow-up were  
57  
58 censored and found that the inverse association between *Ikigai* and risk of CVD mortality remained unchanged.  
59  
60

1  
2  
3 Lastly, although we adjusted for numerous potential confounders, some unmeasured confounders, such as the  
4 usage of medical services, may still be present. A previous study using a national panel study of 7 168 US adults  
5 showed that having a purpose in life was associated with a higher likelihood of using health care services such as  
6 cholesterol tests, colonoscopies, mammogram/X-ray, pap smear, and prostate examinations <sup>37</sup>.  
7  
8  
9

## 14 **Conclusion**

15  
16 We found that *Ikigai* was associated with a lower risk of CVD mortality for all participants, particularly  
17 unemployed men and women. Having *Ikigai* could reduce the risk of CVD mortality among unemployed  
18 persons.  
19  
20  
21  
22  
23

## 26 **Acknowledgments**

27  
28 We express our sincere thanks to Drs. Kunio Aoki and Yoshiyuki Ohno, Professors Emeritus of the Nagoya  
29 University School of Medicine and former chairpersons of the JACC Study. We are also greatly indebted to Dr.  
30 Haruo Sugano, former Director of the Cancer Institute, Tokyo, who contributed greatly to the initiation of the  
31 JACC Study; to Dr. Tomoyuki Kitagawa, Director Emeritus of the Cancer Institute of the Japanese Foundation  
32 for Cancer Research and former project leader of the Grant-in-Aid for Scientific Research on Priority Area'  
33 Cancer'; and to Dr. Kazao Tajima, Aichi Cancer Center, who was the previous project leader of the Grant-in-Aid  
34 for Scientific Research on Priority Area of Cancer Epidemiology.  
35  
36  
37  
38  
39

40 Writing Committee Members for the JACC Study Group Dr. Akiko Tamakoshi (present chairperson of the  
41 study group), Hokkaido University Graduate School of Medicine; Drs. Mitsuru Mori and Fumio Sakauchi,  
42 Sapporo Medical University School of Medicine; Dr. Yutaka Motohashi, Akita University School of Medicine;  
43  
44 Dr. Ichiro Tsuji, Tohoku University Graduate School of Medicine; Dr. Yoshikazu Nakamura, Jichi Medical  
45 School; Dr. Hiroyasu Iso, Osaka University School of Medicine; Dr. Haruo Mikami, Chiba Cancer Center; Dr.  
46 Michiko Kurosawa, Juntendo University School of Medicine; Dr. Yoshiharu Hoshiyama, Yokohama Soei  
47 University; Dr. Naohito Tanabe, University of Niigata Prefecture; Dr. Koji Tamakoshi, Nagoya University  
48  
49  
50  
51  
52  
53  
54  
55  
56  
57  
58  
59  
60

1  
2  
3 Graduate School of Health Science; Dr. Kenji Wakai, Nagoya University Graduate School of Medicine; Dr.  
4  
5 Shinkan Tokudome, National Institute of Health and Nutrition; Dr. Koji Suzuki, Fujita Health University School  
6  
7 of Health Sciences; Dr. Shuji Hashimoto, Fujita Health University School of Medicine; Dr. Shogo Kikuchi,  
8  
9 Aichi Medical University School of Medicine; Dr. Yasuhiko Wada, Faculty of Nutrition, University of Kochi;  
10  
11 Dr. Takashi Kawamura, Kyoto University Center for Student Health; Dr. Yoshiyuki Watanabe, Kyoto  
12  
13 Prefectural University of Medicine Graduate School of Medical Science; Dr. Kotaro Ozasa, Radiation Effects  
14  
15 Research Foundation; Dr. Tsuneharu Miki, Kyoto Prefectural University of Medicine Graduate School of  
16  
17 Medical Science; Dr. Chigusa Date, School of Human Science and Environment, University of Hyogo; Dr.  
18  
19 Kiyomi Sakata, Iwate Medical University; Dr. Yoichi Kurozawa, Tottori University Faculty of Medicine; Drs.  
20  
21 Takesumi Yoshimura and Yoshihisa Fujino, University of Occupational and Environmental Health; Dr. Akira  
22  
23 Shibata, Kurume University; Dr. Naoyuki Okamoto, Kanagawa Cancer Center; and Dr. Hideo Shio, Moriyama  
24  
25 Municipal Hospital.  
26  
27  
28  
29  
30  
31  
32

33 **Author Contributions:** HI and AT conceived and designed the study; JM, and KS drafted the plan for the data  
34  
35 analyses; JM and TK conducted data analysis; SI and TK provided statistical expertise and interpreted the data;  
36  
37 JM drafted the manuscript; HI and KS analyzed and interpreted the data, and critically revised the manuscript;  
38  
39 JM, KS, and HI had primary responsibility for final content; and all authors were involved in interpretation of  
40  
41 the results and revision of the manuscript and approved the final version of the manuscripts. JM, KS, and HI are  
42  
43 guarantors.  
44  
45

46  
47 **Copyright:** The corresponding author has the right to grant as behalf of all authors and does grant an exclusive  
48  
49 licence (or non-exclusive for government employees) on the whole basis to the BMJ Publishing Group Ltd to  
50  
51 allow this article (if accepted) to publish in BMJ editions and any other BMJ PGL products and sublicences such  
52  
53 use and exploit all subsidiary rights, as set out in our licence.  
54  
55

56  
57 **Funding:** This study has been supported by Grants-in-Aid for Scientific Research from the Ministry of  
58  
59 Education, Culture, Sports, Science and Technology of Japan (MEXT) (MonbuKagaku-sho); Grants-in-Aid for  
60



1  
2  
3 Scientific Research on Priority Areas of Cancer; and Grants-in-Aid for Scientific Research on Priority Areas of  
4 Cancer Epidemiology from MEXT (Nos. 61010076, 62010074, 63010074, 1010068, 2151065, 3151064,  
5 4151063, 5151069, 6279102, 11181101, 17015022, 18014011, 20014026, 20390156, 26293138), and JSPS  
6 KAKENHI No.16H06277. This research was also supported by Grant-in-Aid from the Ministry of Health,  
7 Labour and Welfare, Health and Labor Sciences research grants, Japan (Comprehensive Research on  
8 Cardiovascular Disease and Lifestyle Related Diseases: H20-Junkankitou [Seishuu]-Ippan-013; H23-  
9 Junkankitou [Seishuu]-Ippan-005); an Intramural Research Fund (22-4-5) for Cardiovascular Diseases of  
10 National Cerebral and Cardiovascular Center; Comprehensive Research on Cardiovascular Diseases and  
11 Lifestyle Related Diseases (H26-Junkankitou [Seisaku]-Ippan-001) and H29-Junkankitou [Seishuu]-Ippan-003  
12 and 20FA1002.

13  
14  
15  
16  
17  
18  
19  
20  
21  
22  
23  
24  
25  
26 **Competing interests:** All authors have completed the ICMJE uniform disclosure form at  
27 [www.icmje.org/coi\\_disclosure.pdf](http://www.icmje.org/coi_disclosure.pdf) and declare: no support from any organisation for the submitted work; no  
28 financial relationships with any organisations that might have an interest in the submitted work in the previous  
29 three years; no other relationships or activities that could appear to have influenced the submitted work.

30  
31  
32  
33  
34  
35  
36  
37  
38  
39  
40  
41  
42  
43  
44  
45  
46  
47  
48  
49  
50  
51  
52  
53  
54  
55  
56  
57  
58  
59  
60  
**Ethical approval:** This study was approved by Osaka University and Hokkaido University. The participants  
were provided informed consent to be involved in this epidemiological study. Individual informed consent was  
obtained from each participant in 36 out of the 45 study areas (written consent in 35 areas and oral consent in 1  
area). In the remaining nine areas, group consent was obtained from each community representative.

**Transparency:** JM, KS, and HI affirm that the manuscript is an honest, accurate, and transparent account of the  
study being reported; that no important aspects of the study have been omitted; and that any discrepancies from  
the study as planned have been explained.

**Data sharing:** No additional data available.

## REFERENCES

1. Collins AL, Gleib DA, Goldman N. The role of life satisfaction and depressive symptoms in all-cause mortality. *Psychology and aging* 2009;24(3):696-702. doi: 10.1037/a0016777  
[published Online First: 2009/09/11]
2. Koivumaa-Honkanen H, Honkanen R, Viinamaki H, et al. Self-reported life satisfaction and 20-year mortality in healthy Finnish adults. *American journal of epidemiology* 2000;152(10):983-91.
3. Steptoe A. Happiness and Health. *Annual review of public health* 2019;40:339-59. doi: 10.1146/annurev-publhealth-040218-044150 [published Online First: 2019/01/03]
4. Shirai K, Iso H, Ohira T, et al. Perceived level of life enjoyment and risks of cardiovascular disease incidence and mortality: the Japan public health center-based study. *Circulation* 2009;120(11):956-63. doi: 10.1161/CIRCULATIONAHA.108.834176
5. Rozanski A, Bavishi C, Kubzansky LD, et al. Association of Optimism With Cardiovascular Events and All-Cause Mortality: A Systematic Review and Meta-analysis. *JAMA Netw Open* 2019;2(9):e1912200. doi: 10.1001/jamanetworkopen.2019.12200 [published Online First: 2019/09/29]
6. Tomioka K, Kurumatani N, Hosoi H. Relationship of Having Hobbies and a Purpose in Life With Mortality, Activities of Daily Living, and Instrumental Activities of Daily Living Among Community-Dwelling Elderly Adults. *Journal of epidemiology* 2016;26(7):361-70. doi: 10.2188/jea.JE20150153

- 1  
2  
3 7. Tang M, Wang D, Guerrien A. A systematic review and meta-analysis on basic psychological  
4  
5 need satisfaction, motivation, and well-being in later life: Contributions of self-determination  
6  
7 theory. *PsyCh journal* 2019 doi: 10.1002/pchj.293 [published Online First: 2019/06/10]  
8  
9
- 10  
11 8. Cohen R, Bavishi C, Rozanski A. Purpose in Life and Its Relationship to All-Cause Mortality and  
12  
13 Cardiovascular Events: A Meta-Analysis. *Psychosomatic medicine* 2016;78(2):122-33. doi:  
14  
15 10.1097/PSY.0000000000000274 [published Online First: 2015/12/03]  
16  
17
- 18  
19 9. Mathews G. What Makes Life Worth Living? How Japanese and Americans Make Sense of Their  
20  
21 Worlds. *Berkeley: University of California Press* 1996  
22  
23
- 24  
25 10. Shirai K, Iso H, Fukuda H, et al. Factors associated with "Ikigai" among members of a public  
26  
27 temporary employment agency for seniors (Silver Human Resources Centre) in Japan; gender  
28  
29 differences. *Health and quality of life outcomes* 2006;4:12. doi: 10.1186/1477-7525-4-12  
30  
31
- 32  
33 11. Weiss RS, Bass SA, Heimovitz HK, et al. Japan's silver human resource centers and participant  
34  
35 well-being. *Journal of cross-cultural gerontology* 2005;20(1):47-66. doi: 10.1007/s10823-  
36  
37 005-3797-4  
38  
39
- 40  
41 12. Sone T, Nakaya N, Ohmori K, et al. Sense of life worth living (ikigai) and mortality in Japan:  
42  
43 Ohsaki Study. *Psychosomatic medicine* 2008;70(6):709-15. doi:  
44  
45 10.1097/PSY.0b013e31817e7e64  
46  
47
- 48  
49 13. Sloane E, Schrenker R. Conceptual Design and Resources for a General-Purpose Safety and  
50  
51 Performance Verification and Validation Toolkit (V2T) for Life-Critical Wireless Medical  
52  
53 Device Networks (WMDN). *Conf Proc IEEE Eng Med Biol Soc* 2005;1:178-81. doi:  
54  
55 10.1109/IEMBS.2005.1616371 [published Online First: 2007/02/07]  
56  
57  
58  
59  
60

- 1  
2  
3 14. Roelfs DJ, Shor E, Davidson KW, et al. Losing life and livelihood: a systematic review and  
4  
5 meta-analysis of unemployment and all-cause mortality. *Social science & medicine*  
6  
7 2011;72(6):840-54. doi: 10.1016/j.socscimed.2011.01.005 [published Online First:  
8  
9 2011/02/19]  
10  
11  
12  
13 15. Meneton P, Kesse-Guyot E, Mejean C, et al. Unemployment is associated with high  
14  
15 cardiovascular event rate and increased all-cause mortality in middle-aged socially privileged  
16  
17 individuals. *International archives of occupational and environmental health*  
18  
19 2015;88(6):707-16. doi: 10.1007/s00420-014-0997-7  
20  
21  
22  
23 16. Gallo WT. Evolution of research on the effect of unemployment on acute myocardial infarction  
24  
25 risk. *Archives of internal medicine* 2012;172(22):1737-8. doi:  
26  
27 10.1001/jamainternmed.2013.1835 [published Online First: 2012/11/21]  
28  
29  
30  
31 17. Brenner MH. The impact of unemployment on heart disease and stroke mortality in European  
32  
33 Union Countries. *EU publications* 2016 doi: 10.2767/81253  
34  
35  
36  
37 18. Vanthomme K, Gadeyne S. Unemployment and cause-specific mortality among the Belgian  
38  
39 working-age population: The role of social context and gender. *PloS one*  
40  
41 2019;14(5):e0216145. doi: 10.1371/journal.pone.0216145  
42  
43  
44  
45 19. Weden MM, Astone NM, Bishai D. Racial, ethnic, and gender differences in smoking cessation  
46  
47 associated with employment and joblessness through young adulthood in the US. *Social*  
48  
49 *science & medicine* 2006;62(2):303-16. doi: 10.1016/j.socscimed.2005.06.009 [published  
50  
51 Online First: 2005/07/21]  
52  
53  
54  
55 20. Janlert U. Unemployment as a disease and diseases of the unemployed. *Scandinavian journal of*  
56  
57 *work, environment & health* 1997;23 Suppl 3:79-83. [published Online First: 1997/01/01]  
58  
59  
60

- 1  
2  
3 21. Backhans MC, Balliu N, Lundin A, et al. Unemployment Is a Risk Factor for Hospitalization  
4  
5 Due to Alcohol Problems: A Longitudinal Study Based on the Stockholm Public Health  
6  
7 Cohort (SPHC). *Journal of studies on alcohol and drugs* 2016;77(6):936-42. doi:  
8  
9 10.15288/jsad.2016.77.936 [published Online First: 2016/11/01]  
10  
11  
12  
13 22. Hammarstrom A. Health consequences of youth unemployment--review from a gender  
14  
15 perspective. *Social science & medicine* 1994;38(5):699-709.  
16  
17  
18 23. Schaller J, Stevens AH. Short-run effects of job loss on health conditions, health insurance, and  
19  
20 health care utilization. *Journal of health economics* 2015;43:190-203. doi:  
21  
22 10.1016/j.jhealeco.2015.07.003  
23  
24  
25 24. Kim ES, Sun JK, Park N, et al. purpose in life and reduced incidence of stroke in older adults:  
26  
27 'The Health and Retirement Study'. *Journal of psychosomatic research* 2013;74(5):427-32.  
28  
29 doi: 10.1016/j.jpsychores.2013.01.013 [published Online First: 2013/04/20]  
30  
31  
32  
33 25. Tamakoshi A, Ozasa K, Fujino Y, et al. Cohort profile of the Japan Collaborative Cohort Study  
34  
35 at final follow-up. *Journal of epidemiology* 2013;23(3):227-32.  
36  
37  
38  
39 26. Yasukawa S, Eguchi E, Ogino K, et al. "Ikigai", Subjective Wellbeing, as a Modifier of the  
40  
41 Parity-Cardiovascular Mortality Association- The Japan Collaborative Cohort Study.  
42  
43 *Circulation journal : official journal of the Japanese Circulation Society* 2018;82(5):1302-  
44  
45 08. doi: 10.1253/circj.CJ-17-1201  
46  
47  
48  
49 27. Tanno K, Sakata K, Japan Collaborative Cohort Study for Evaluation of C. Psychological factors  
50  
51 and mortality in the Japan Collaborative Cohort Study for Evaluation of Cancer (JACC).  
52  
53 *Asian Pacific journal of cancer prevention : APJCP* 2007;8 Suppl:113-22.  
54  
55  
56  
57  
58  
59  
60

- 1  
2  
3 28. De Martinis M, Franceschi C, Monti D, et al. Inflammation markers predicting frailty and  
4 mortality in the elderly. *Experimental and molecular pathology* 2006;80(3):219-27. doi:  
5 10.1016/j.yexmp.2005.11.004 [published Online First: 2006/02/08]  
6  
7  
8  
9  
10  
11 29. Harris TB, Ferrucci L, Tracy RP, et al. Associations of elevated interleukin-6 and C-reactive  
12 protein levels with mortality in the elderly. *The American journal of medicine*  
13 1999;106(5):506-12. [published Online First: 1999/05/21]  
14  
15  
16  
17  
18  
19 30. Reuben DB, Cheh AI, Harris TB, et al. Peripheral blood markers of inflammation predict  
20 mortality and functional decline in high-functioning community-dwelling older persons.  
21 *Journal of the American Geriatrics Society* 2002;50(4):638-44. [published Online First:  
22 2002/05/02]  
23  
24  
25  
26  
27  
28  
29 31. Zilioli S, Slatcher RB, Ong AD, et al. purpose in life predicts allostatic load ten years later.  
30 *Journal of psychosomatic research* 2015;79(5):451-7. doi: 10.1016/j.jpsychores.2015.09.013  
31 [published Online First: 2015/11/04]  
32  
33  
34  
35  
36  
37 32. Giltay EJ, Geleijnse JM, Zitman FG, et al. Dispositional optimism and all-cause and  
38 cardiovascular mortality in a prospective cohort of elderly dutch men and women. *Archives*  
39 *of general psychiatry* 2004;61(11):1126-35. doi: 10.1001/archpsyc.61.11.1126 [published  
40 Online First: 2004/11/03]  
41  
42  
43  
44  
45  
46  
47 33. Ostir GV, Markides KS, Peek MK, et al. The association between emotional well-being and the  
48 incidence of stroke in older adults. *Psychosomatic medicine* 2001;63(2):210-5. [published  
49 Online First: 2001/04/09]  
50  
51  
52  
53  
54  
55 34. Tanno K, Sakata K, Ohsawa M, et al. Associations of ikigai as a positive psychological factor  
56 with all-cause mortality and cause-specific mortality among middle-aged and elderly  
57  
58  
59  
60

1  
2  
3  
4  
5  
6  
7  
8  
9  
10  
11  
12  
13  
14  
15  
16  
17  
18  
19  
20  
21  
22  
23  
24  
25  
26  
27  
28  
29  
30  
31  
32  
33  
34  
35  
36  
37  
38  
39  
40  
41  
42  
43  
44  
45  
46  
47  
48  
49  
50  
51  
52  
53  
54  
55  
56  
57  
58  
59  
60

Japanese people: findings from the Japan Collaborative Cohort Study. *Journal of psychosomatic research* 2009;67(1):67-75. doi: 10.1016/j.jpsychores.2008.10.018

35. Janlert U. Unemployment and blood pressure in Swedish building labourers. *Journal of internal medicine* 1992;231(3):241-6. doi: 10.1111/j.1365-2796.1992.tb00530.x [published Online First: 1992/03/01]
36. Ostir GV, Berges IM, Markides KS, et al. Hypertension in older adults and the role of positive emotions. *Psychosomatic medicine* 2006;68(5):727-33. doi: 10.1097/01.psy.0000234028.93346.38 [published Online First: 2006/10/03]
37. Kim ES, Strecher VJ, Ryff CD. Purpose in life and use of preventive health care services. *Proceedings of the National Academy of Sciences of the United States of America* 2014;111(46):16331-6. doi: 10.1073/pnas.1414826111 [published Online First: 2014/11/05]

**Table 1. Sex-specific, mean values and proportions of baseline characteristics according to the perceived levels of *Ikigai*.**

|                                    | Men         |              |              |                 | Women       |              |              |                 |
|------------------------------------|-------------|--------------|--------------|-----------------|-------------|--------------|--------------|-----------------|
|                                    | Low         | Moderate     | High         | <i>P</i> -Value | Low         | Moderate     | High         | <i>P</i> -Value |
| No. at risk, n (%)                 | 2197(7.4)   | 12240(41.5)  | 15080(51.1)  |                 | 3819(9.1)   | 20308(48.4)  | 17857(42.5)  |                 |
| Age, years                         | 57.4        | 57.2         | 56.8         | <0.001          | 58.1        | 57.7         | 56.8         | <0.001          |
| Body Mass Index, kg/m <sup>2</sup> | 22.5        | 22.5         | 22.8         | <0.001          | 23.1        | 22.8         | 23.1         | <0.001          |
| Employment status, n (%)           |             |              |              | <0.001          |             |              |              | <0.001          |
| Employed                           | 560 (25.5)  | 4658 (38.1)  | 5362 (35.6)  |                 | 385 (10.1)  | 2714 (13.4)  | 2550 (14.3)  |                 |
| Self-employed                      | 423 (19.3)  | 3860 (31.5)  | 5669 (37.6)  |                 | 367 (9.6)   | 3137 (15.4)  | 3321 (18.6)  |                 |
| Part-time worker                   | 24 (1.1)    | 267 (2.2)    | 282 (1.9)    |                 | 290 (7.6)   | 1987 (9.8)   | 1779 (10.0)  |                 |
| Unemployed                         | 436 (19.8)  | 2262 (18.5)  | 1802 (11.9)  |                 | 894 (23.4)  | 4364 (21.5)  | 2637 (14.8)  |                 |
| Homemaker                          | 2 (0.1)     | 13 (0.1)     | 9 (0.1)      |                 | 685 (17.9)  | 6201 (30.5)  | 4908 (27.5)  |                 |
| Other                              | 752 (34.2)  | 1180 (9.6)   | 1956 (13)    |                 | 1198 (31.4) | 1905 (9.4)   | 2662 (14.9)  |                 |
| Education level, n (%)             |             |              |              | <0.001          |             |              |              | <0.001          |
| <16 years                          | 714 (48.0)  | 4465 (39.1)  | 4079 (30.2)  |                 | 1329 (49.8) | 7686 (40.7)  | 4826 (30.6)  |                 |
| 16-18 years                        | 556 (37.4)  | 5252 (46)    | 6515 (48.3)  |                 | 1128 (42.3) | 9580 (50.7)  | 8874 (56.3)  |                 |
| ≥ 19 years                         | 217 (14.6)  | 1712 (15)    | 2891 (21.4)  |                 | 210 (7.9)   | 1639 (8.7)   | 2052 (13.0)  |                 |
| Alcohol consumption, n (%)         |             |              |              | <0.001          |             |              |              | <0.001          |
| Never                              | 412 (19.6)  | 2225 (19.0)  | 2514 (17.3)  |                 | 2691 (77.2) | 14305 (76.2) | 12042 (72.0) |                 |
| Past                               | 221 (10.5)  | 694 (5.9)    | 738 (5.1)    |                 | 97 (2.8)    | 294 (1.6)    | 283 (1.7)    |                 |
| Current                            | 1468 (69.9) | 8814 (75.1)  | 11264 (77.6) |                 | 697 (20.0)  | 4173 (22.2)  | 4408 (26.3)  |                 |
| Smoking status, n (%)              |             |              |              |                 |             |              |              | 0.007           |
| Never                              | 413 (19.6)  | 2322 (19.9)  | 3153 (21.8)  |                 | 3053 (91.6) | 16664 (93.5) | 14943 (93.6) |                 |
| Past                               | 507 (24.1)  | 2945 (25.2)  | 3627 (25.0)  |                 | 68 (2.0)    | 253 (1.4)    | 214 (1.3)    |                 |
| Current                            | 1186 (56.3) | 6416 (54.9)  | 7708 (53.2)  |                 | 212 (6.4)   | 911 (5.1)    | 814 (5.1)    |                 |
| Marital status, n (%)              |             |              |              | <0.001          |             |              |              | <0.001          |
| Living with a spouse               | 1708 (86.0) | 10358 (93.0) | 13424 (95.4) |                 | 2530 (75.4) | 15317 (83.9) | 14081 (84.8) |                 |
| Widowed                            | 127 (6.4)   | 391 (3.5)    | 368 (2.6)    |                 | 620 (18.5)  | 2257 (12.4)  | 2009 (12.1)  |                 |
| Divorced                           | 56 (2.8)    | 182 (1.6)    | 149 (1.1)    |                 | 90 (2.7)    | 417 (2.3)    | 344 (2.1)    |                 |
| Single                             | 95 (4.8)    | 210 (1.9)    | 134 (1)      |                 | 114 (3.4)   | 276 (1.5)    | 176 (1.1)    |                 |
| Sports activity time, n (%)        |             |              |              | <0.001          |             |              |              | <0.001          |
| never                              | 1705 (81.2) | 8431 (72.5)  | 9060 (62.6)  |                 | 3105 (86.6) | 14951 (79.3) | 11876 (70.6) |                 |
| 1-2 h/w                            | 213 (10.1)  | 1787 (15.4)  | 2807 (19.4)  |                 | 272 (7.6)   | 2343 (12.4)  | 2803 (16.7)  |                 |
| 3-4 h/w                            | 108 (5.1)   | 721 (6.2)    | 1302 (9.0)   |                 | 129 (3.6)   | 851 (4.5)    | 1188 (7.1)   |                 |



|    |                                     |             |             |             |             |        |             |              |              |        |
|----|-------------------------------------|-------------|-------------|-------------|-------------|--------|-------------|--------------|--------------|--------|
| 1  |                                     | ≥5 h/w      | 73 (3.5)    | 687 (5.9)   | 1307 (9.0)  |        | 79 (2.2)    | 720 (3.8)    | 956 (5.7)    |        |
| 2  | Walking time, n (%)                 |             |             |             |             | <0.001 |             |              |              | <.0001 |
| 3  |                                     | never       | 294 (18.8)  | 1354 (11.6) | 1307 (9.5)  |        | 390 (14.3)  | 1852 (9.7)   | 1221 (7.7)   |        |
| 4  |                                     | 0.5 h/day   | 302 (19.3)  | 2268 (19.4) | 2453 (17.8) |        | 525 (19.3)  | 3444 (18.0)  | 2596 (16.4)  |        |
| 5  |                                     | 0.5-1 h/day | 271 (17.3)  | 2339 (20.0) | 2788 (20.3) |        | 558 (20.5)  | 4198 (21.9)  | 3249 (20.5)  |        |
| 6  |                                     | ≥1 h/day    | 695 (44.5)  | 5757 (49.1) | 7195 (52.4) |        | 1246 (45.8) | 9690 (50.5)  | 8777 (55.4)  |        |
| 7  | Sleep duration, h/d                 |             | 7.6         | 7.5         | 7.4         | 0.009  | 7.2         | 7.1          | 7.1          | 0.008  |
| 8  | Perceived mental stress, n (%)      |             |             |             |             | <0.001 |             |              |              | <0.001 |
| 9  |                                     | Low         | 378 (17.7)  | 1382 (11.4) | 3107 (20.9) |        | 541 (14.6)  | 2319 (11.6)  | 4300 (24.4)  |        |
| 10 |                                     | Moderate    | 1029 (48.1) | 8237 (68.2) | 8332 (55.9) |        | 1838 (49.8) | 13907 (69.8) | 10169 (57.6) |        |
| 11 |                                     | High        | 733 (34.3)  | 2451 (20.3) | 3458 (23.2) |        | 1315 (35.6) | 3699 (18.6)  | 3184 (18.0)  |        |
| 12 | Sense of life enjoyment, n (%)      |             |             |             |             | <0.001 |             |              |              | <0.001 |
| 13 |                                     | Low         | 417 (19.2)  | 399 (3.3)   | 193 (1.3)   |        | 775 (20.7)  | 686 (3.4)    | 184 (1.0)    |        |
| 14 |                                     | Moderate    | 965 (44.4)  | 9101 (75.0) | 5612 (37.5) |        | 1753 (46.7) | 15044 (75.2) | 5937 (33.5)  |        |
| 15 |                                     | High        | 230 (10.6)  | 2640 (21.7) | 8265 (55.2) |        | 315 (8.4)   | 4288 (21.4)  | 10234 (57.8) |        |
| 16 | History of hypertension, n (%)      |             | 485 (24.7)  | 2305 (20.5) | 2698 (19.2) | 0.050  | 975 (28)    | 4107 (22.3)  | 3433 (20.8)  | 0.188  |
| 17 | History of diabetes mellitus, n (%) |             | 153 (8.1)   | 729 (6.6)   | 895 (6.5)   | 0.888  | 197 (5.9)   | 735 (4.1)    | 566 (3.5)    | 0.062  |

**Table 2. Sex-specific, age-adjusted, and multivariable hazard ratios (HRs) and 95% confidence intervals (CIs) of cardiovascular mortality according to the perceived levels of *Ikigai*, stratified by employment status.**

|                            | Men   |                            |                            |                           | Women |                            |                            |                           |
|----------------------------|-------|----------------------------|----------------------------|---------------------------|-------|----------------------------|----------------------------|---------------------------|
|                            | Low   | Moderate                   | High                       | <i>P</i> <sub>Trend</sub> | Low   | Moderate                   | High                       | <i>P</i> <sub>Trend</sub> |
| <b>All</b>                 |       |                            |                            |                           |       |                            |                            |                           |
| No. at risk                | 2197  | 12240                      | 15080                      |                           | 3819  | 20308                      | 17857                      |                           |
| No. of person-years        | 32824 | 191424                     | 244694                     |                           | 61744 | 330980                     | 298982                     |                           |
| No. of deaths              | 251   | 1007                       | 1135                       |                           | 307   | 1129                       | 851                        |                           |
| Age-adjusted HR (95%CI)    | 1.00  | <b>0.66 (0.58 to 0.76)</b> | <b>0.57 (0.50 to 0.65)</b> | <b>&lt;0.001</b>          | 1.00  | <b>0.75 (0.66 to 0.86)</b> | <b>0.68 (0.60 to 0.78)</b> | <b>&lt;0.001</b>          |
| Multivariable * HR (95%CI) | 1.00  | <b>0.80 (0.68 to 0.93)</b> | <b>0.74 (0.64 to 0.87)</b> | <b>&lt;0.001</b>          | 1.00  | 0.87 (0.75 to 1.00)        | 0.88 (0.76 to 1.03)        | 0.136                     |
| <b>Employed</b>            |       |                            |                            |                           |       |                            |                            |                           |
| No. at risk                | 560   | 4658                       | 5362                       |                           | 385   | 2714                       | 2550                       |                           |
| No. of person-years        | 9479  | 80287                      | 92997                      |                           | 6695  | 48860                      | 46328                      |                           |
| No. of deaths              | 22    | 193                        | 192                        |                           | 7     | 43                         | 44                         |                           |
| Age-adjusted HR (95%CI)    | 1.00  | 0.92 (0.59 to 1.44)        | 0.73 (0.47 to 1.14)        | 0.051                     | 1.00  | 0.85 (0.38 to 1.89)        | 0.89 (0.40 to 1.97)        | 0.916                     |
| Multivariable * HR (95%CI) | 1.00  | 1.02 (0.63 to 1.63)        | 0.80 (0.49 to 1.31)        | 0.116                     | 1.00  | 0.82 (0.35 to 1.95)        | 1.01 (0.41 to 2.48)        | 0.679                     |
| <b>Self-employed</b>       |       |                            |                            |                           |       |                            |                            |                           |
| No. at risk                | 423   | 3860                       | 5669                       |                           | 367   | 3137                       | 3321                       |                           |
| No. of person-years        | 6347  | 61848                      | 93546                      |                           | 6025  | 53663                      | 56797                      |                           |
| No. of deaths              | 35    | 290                        | 425                        |                           | 9     | 113                        | 102                        |                           |
| Age-adjusted HR (95%CI)    | 1.00  | 0.76 (0.54 to 1.08)        | 0.71 (0.50 to 1.00)        | 0.120                     | 1.00  | 1.14 (0.58 to 2.25)        | 0.98 (0.50 to 1.94)        | 0.523                     |
| Multivariable * HR (95%CI) | 1.00  | 0.86 (0.60 to 1.24)        | 0.85 (0.59 to 1.22)        | 0.682                     | 1.00  | 1.30 (0.62 to 2.73)        | 1.29 (0.60 to 2.76)        | 0.782                     |
| <b>Part-time worker</b>    |       |                            |                            |                           |       |                            |                            |                           |
| No. at risk                | 24    | 267                        | 282                        |                           | 290   | 1987                       | 1779                       |                           |
| No. of person-years        | 336   | 4037                       | 4344                       |                           | 4941  | 34182                      | 30244                      |                           |
| No. of deaths              | 2     | 27                         | 24                         |                           | 7     | 28                         | 33                         |                           |
| Age-adjusted HR (95%CI)    | 1.00  | 0.78 (0.18 to 3.28)        | 0.51 (0.12 to 2.20)        | 0.287                     | 1.00  | 0.55 (0.24 to 1.25)        | 0.73 (0.32 to 1.65)        | 0.279                     |
| Multivariable * HR (95%CI) | 1.00  | 0.91 (0.17 to 4.76)        | 0.70 (0.12 to 4.06)        | 0.762                     | 1.00  | 0.88 (0.34 to 2.25)        | 0.79 (0.30 to 2.04)        | 0.866                     |
| <b>Unemployed</b>          |       |                            |                            |                           |       |                            |                            |                           |
| No. at risk                | 436   | 2262                       | 1802                       |                           | 894   | 4364                       | 2637                       |                           |
| No. of person-years        | 4821  | 27595                      | 23334                      |                           | 11864 | 62898                      | 38599                      |                           |
| No. of deaths              | 84    | 368                        | 250                        |                           | 145   | 555                        | 306                        |                           |
| Age-adjusted HR (95%CI)    | 1.00  | <b>0.63 (0.50 to 0.80)</b> | <b>0.48 (0.37 to 0.61)</b> | <b>&lt;0.001</b>          | 1.00  | <b>0.70 (0.58 to 0.84)</b> | <b>0.62 (0.51 to 0.76)</b> | <b>&lt;0.001</b>          |
| Multivariable * HR (95%CI) | 1.00  | <b>0.74 (0.57 to 0.97)</b> | <b>0.69 (0.52 to 0.93)</b> | <b>0.044</b>              | 1.00  | <b>0.78 (0.64 to 0.95)</b> | <b>0.77 (0.61 to 0.97)</b> | <b>0.039</b>              |

**Homemaker**

|                            |    |     |     |       |                            |                            |  |              |
|----------------------------|----|-----|-----|-------|----------------------------|----------------------------|--|--------------|
| No. at risk                | 2  | 13  | 9   | 685   | 6201                       | 4908                       |  |              |
| No. of person-years        | 33 | 164 | 137 | 10963 | 100252                     | 80823                      |  |              |
| No. of deaths              | 0  | 0   | 0   | 46    | 266                        | 184                        |  |              |
| Age-adjusted HR (95%CI)    | -  | -   | -   | 1.00  | <b>0.67 (0.49 to 0.91)</b> | <b>0.57 (0.41 to 0.78)</b> |  | <b>0.003</b> |
| Multivariable * HR (95%CI) | -  | -   | -   | 1.00  | 0.83 (0.59 to 1.17)        | 0.84 (0.58 to 1.22)        |  | 0.576        |

**Other**

|                            |       |                            |                            |                  |       |                     |                     |       |
|----------------------------|-------|----------------------------|----------------------------|------------------|-------|---------------------|---------------------|-------|
| No. at risk                | 752   | 1180                       | 1956                       | 1198             | 1905  | 2662                |                     |       |
| No. of person-years        | 11808 | 17493                      | 30335                      | 21257            | 31124 | 46191               |                     |       |
| No. of deaths              | 108   | 129                        | 244                        | 93               | 124   | 182                 |                     |       |
| Age-adjusted HR (95%CI)    | 1.00  | <b>0.62 (0.48 to 0.80)</b> | <b>0.67 (0.53 to 0.84)</b> | <b>&lt;0.001</b> | 1.00  | 0.81 (0.62 to 1.06) | 0.83 (0.65 to 1.06) | 0.253 |
| Multivariable * HR (95%CI) | 1.00  | <b>0.64 (0.47 to 0.87)</b> | <b>0.76 (0.59 to 0.97)</b> | <b>0.016</b>     | 1.00  | 0.91 (0.64 to 1.29) | 1.00 (0.76 to 1.31) | 0.813 |

\* Adjusted for age, body mass index, smoking status, alcohol consumption, sports activity, walking time, sleep duration, education level, employment status, marital status, sense of life enjoyment, perceived mental stress, medical history of hypertension, and diabetes mellitus.

**Table 3. Sex-specific, multivariable hazard ratios (HRs) and 95% confidence intervals (CIs) of cardiovascular mortality according to the perceived levels of *Ikigai* after exclusion of deaths occurred 1 to 5 years from the baseline among unemployed persons.**

|       |                            | <i>Ikigai</i> |                            |                            | <i>P</i> <sub>Trend</sub> |
|-------|----------------------------|---------------|----------------------------|----------------------------|---------------------------|
|       |                            | Low           | Moderate                   | High                       |                           |
| Men   |                            |               |                            |                            |                           |
|       | At Risk                    | 436           | 2262                       | 1802                       |                           |
|       | Person-years               | 4821          | 27595                      | 23334                      |                           |
|       | No. of deaths              | 84            | 368                        | 250                        |                           |
|       | Multivariable HR           | 1.00          | <b>0.74 (0.57 to 0.97)</b> | <b>0.69 (0.52 to 0.93)</b> | <b>0.044</b>              |
|       |                            | 79            | 358                        | 243                        |                           |
|       | Deaths within 1 y exclude  | 1.00          | <b>0.74 (0.56 to 0.97)</b> | <b>0.68 (0.51 to 0.92)</b> | <b>0.044</b>              |
|       |                            | 73            | 343                        | 232                        |                           |
|       | Deaths within 2 y exclude  | 1.00          | 0.77 (0.58 to 1.02)        | <b>0.71 (0.52 to 0.96)</b> | 0.087                     |
|       |                            | 67            | 318                        | 223                        |                           |
|       | Deaths within 3 y exclude  | 1.00          | 0.75 (0.56 to 1.01)        | <b>0.71 (0.52 to 0.98)</b> | 0.104                     |
|       |                            | 60            | 299                        | 210                        |                           |
|       | Deaths within 4 y exclude  | 1.00          | 0.78 (0.57 to 1.06)        | 0.72 (0.52 to 1.01)        | 0.157                     |
|       |                            | 56            | 282                        | 201                        |                           |
|       | Deaths within 5 y exclude  | 1.00          | 0.75 (0.55 to 1.04)        | <b>0.69 (0.49 to 0.98)</b> | 0.115                     |
| Women |                            |               |                            |                            |                           |
|       | No. at risk                | 894           | 4364                       | 2637                       |                           |
|       | No. of person-years        | 11864         | 62898                      | 38599                      |                           |
|       | No. of deaths              | 145           | 555                        | 306                        |                           |
|       | Multivariable HR           | 1.00          | <b>0.78 (0.64 to 0.95)</b> | <b>0.77 (0.61 to 0.97)</b> | <b>0.039</b>              |
|       |                            | 138           | 540                        | 299                        |                           |
|       | Deaths within 1 y excluded | 1.00          | <b>0.78 (0.64 to 0.96)</b> | <b>0.78 (0.62 to 0.98)</b> | 0.056                     |
|       |                            | 134           | 526                        | 290                        |                           |
|       | Deaths within 2 y excluded | 1.00          | <b>0.79 (0.64 to 0.97)</b> | <b>0.78 (0.61 to 0.98)</b> | 0.061                     |
|       |                            | 125           | 498                        | 281                        |                           |
|       | Deaths within 3 y excluded | 1.00          | <b>0.77 (0.62 to 0.96)</b> | 0.78 (0.61 to 1.00)        | 0.057                     |
|       |                            | 113           | 480                        | 273                        |                           |
|       | Deaths within 4 y excluded | 1.00          | 0.81 (0.65 to 1.02)        | 0.83 (0.65 to 1.08)        | 0.193                     |
|       |                            | 112           | 462                        | 267                        |                           |
|       | Deaths within 5 y excluded | 1.00          | <b>0.78 (0.62 to 0.97)</b> | 0.80 (0.62 to 1.04)        | 0.092                     |

\* Adjusted for age, body mass index, smoking status, alcohol consumption, sports activity, walking time, sleep duration, education level, employment status, marital status, sense of life enjoyment, perceived mental stress, medical history of hypertension, and diabetes mellitus.

**Table 4. Age- and sex-adjusted and multivariable hazard ratios (HRs) and 95 % confidence intervals (CIs) of mortality from cardiovascular diseases types according to the perceived levels of *Ikigai* among unemployed persons.**

|                               |                                | <i>Ikigai</i> |                            |                            | <i>P</i> <sub>Trend</sub> |
|-------------------------------|--------------------------------|---------------|----------------------------|----------------------------|---------------------------|
|                               |                                | Low           | Moderate                   | High                       |                           |
|                               | No. at risk                    | 1330          | 6626                       | 4439                       |                           |
|                               | No. of person-years            | 16684         | 90493                      | 61933                      |                           |
| <b>Total stroke</b>           | No. of deaths                  | 107           | 375                        | 242                        |                           |
|                               | Age-, sex-adjusted HR (95%CI)  | 1.00          | <b>0.58 (0.47 to 0.72)</b> | <b>0.51 (0.41 to 0.65)</b> | <b>&lt;0.001</b>          |
|                               | Multivariable * HR (95%CI)     | 1.00          | <b>0.72 (0.57 to 0.91)</b> | <b>0.74 (0.56 to 0.96)</b> | <b>0.022</b>              |
| <b>Ischemic stroke</b>        | No. of deaths                  | 37            | 157                        | 91                         |                           |
|                               | Age-, sex- adjusted HR (95%CI) | 1.00          | 0.70 (0.49 to 1.00)        | <b>0.54 (0.37 to 0.80)</b> | <b>0.007</b>              |
|                               | Multivariable * HR (95%CI)     | 1.00          | 0.82 (0.56 to 1.20)        | 0.80 (0.51 to 1.24)        | 0.555                     |
| <b>Hemorrhagic stroke</b>     | No. of deaths                  | 30            | 95                         | 67                         |                           |
|                               | Age-, sex- adjusted HR (95%CI) | 1.00          | <b>0.54 (0.36 to 0.82)</b> | <b>0.54 (0.35 to 0.83)</b> | <b>0.008</b>              |
|                               | Multivariable * HR (95%CI)     | 1.00          | 0.74 (0.47 to 1.19)        | 0.84 (0.49 to 1.42)        | 0.425                     |
| <b>Coronary heart disease</b> | No. of deaths                  | 43            | 196                        | 99                         |                           |
|                               | Age-, sex- adjusted HR (95%CI) | 1.00          | 0.75 (0.54 to 1.05)        | <b>0.51 (0.36 to 0.74)</b> | <b>&lt;0.001</b>          |
|                               | Multivariable * HR (95%CI)     | 1.00          | 0.77 (0.54 to 1.10)        | <b>0.64 (0.43 to 0.97)</b> | 0.103                     |
| <b>Heart failure</b>          | No. of deaths                  | 43            | 187                        | 120                        |                           |
|                               | Age-, sex- adjusted HR (95%CI) | 1.00          | 0.73 (0.52 to 1.01)        | <b>0.65 (0.46 to 0.92)</b> | 0.055                     |
|                               | Multivariable * HR (95%CI)     | 1.00          | 0.90 (0.63 to 1.30)        | 1.01 (0.67 to 1.52)        | 0.663                     |

\* Adjusted for age, sex, body mass index, smoking status, alcohol consumption, sports activity, walking time, sleep duration, education level, employment status, marital status, sense of life enjoyment, perceived mental stress, medical history of hypertension, and diabetes mellitus.

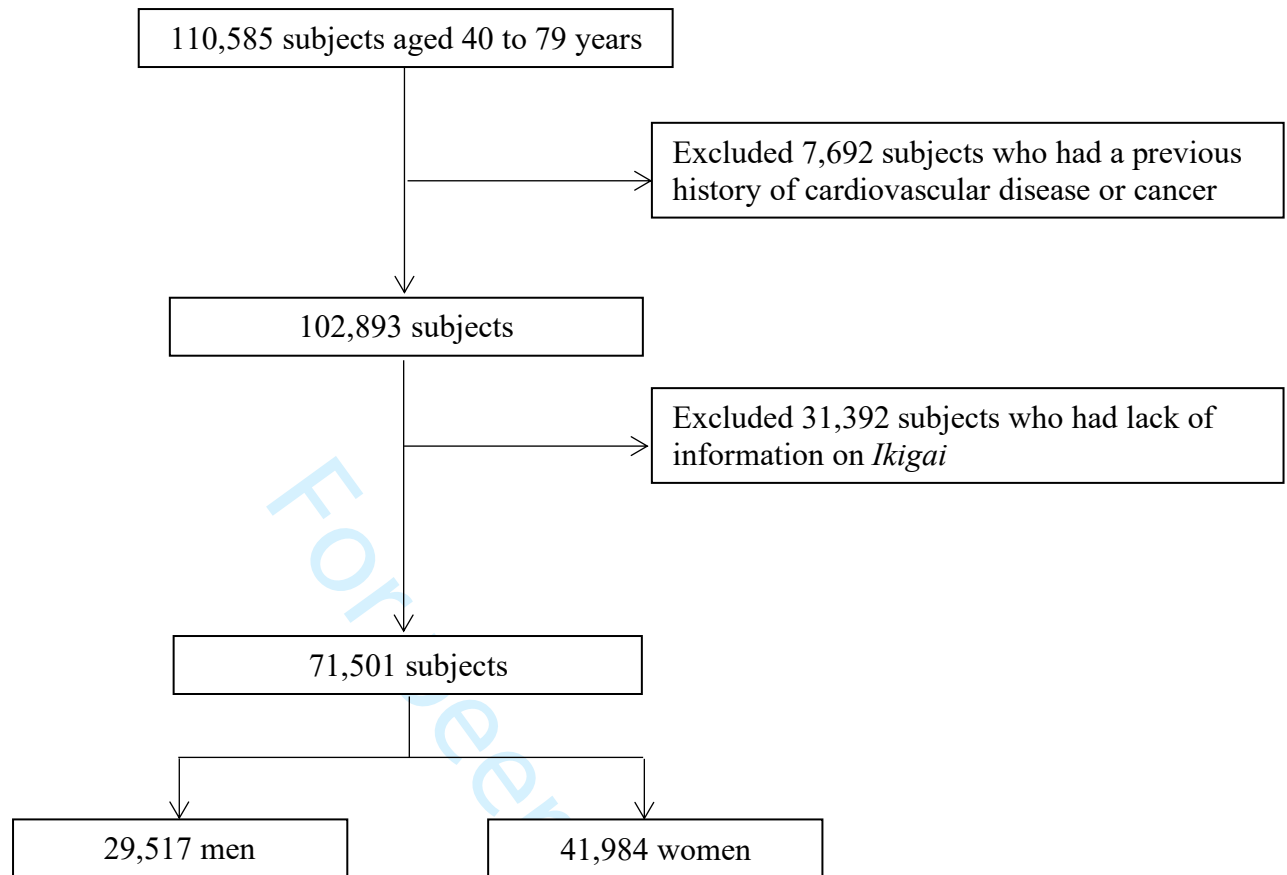

# Reporting checklist for cohort study.

Based on the STROBE cohort guidelines.

## Instructions to authors

Complete this checklist by entering the page numbers from your manuscript where readers will find each of the items listed below.

Your article may not currently address all the items on the checklist. Please modify your text to include the missing information. If you are certain that an item does not apply, please write "n/a" and provide a short explanation.

Upload your completed checklist as an extra file when you submit to a journal.

In your methods section, say that you used the STROBE cohort reporting guidelines, and cite them as:

von Elm E, Altman DG, Egger M, Pocock SJ, Gøtzsche PC, Vandenbroucke JP. The Strengthening of Reporting of Observational Studies in Epidemiology (STROBE) Statement: guidelines for reporting observational studies.

|                           |                     | Reporting Item                                                                                  | Page Number |
|---------------------------|---------------------|-------------------------------------------------------------------------------------------------|-------------|
| <b>Title and abstract</b> |                     |                                                                                                 |             |
| Title                     | <a href="#">#1a</a> | Indicate the study's design with a commonly used term in the title or the abstract              | 1           |
| Abstract                  | <a href="#">#1b</a> | Provide in the abstract an informative and balanced summary of what was done and what was found | 3-4         |
| <b>Introduction</b>       |                     |                                                                                                 |             |
| Background / rationale    | <a href="#">#2</a>  | Explain the scientific background and rationale for the investigation being reported            | 5           |
| Objectives                | <a href="#">#3</a>  | State specific objectives, including any prespecified hypotheses                                | 6           |
| <b>Methods</b>            |                     |                                                                                                 |             |
| Study design              | <a href="#">#4</a>  | Present key elements of study design early in the paper                                         | 6-7         |

|    |                            |                      |                                                                                                                                                                                                                                                                      |     |
|----|----------------------------|----------------------|----------------------------------------------------------------------------------------------------------------------------------------------------------------------------------------------------------------------------------------------------------------------|-----|
| 1  | Setting                    | <a href="#">#5</a>   | Describe the setting, locations, and relevant dates, including periods of recruitment, exposure, follow-up, and data collection                                                                                                                                      | 6-7 |
| 2  |                            |                      |                                                                                                                                                                                                                                                                      |     |
| 3  |                            |                      |                                                                                                                                                                                                                                                                      |     |
| 4  | Eligibility criteria       | <a href="#">#6a</a>  | Give the eligibility criteria, and the sources and methods of selection of participants. Describe methods of follow-up.                                                                                                                                              | 6-7 |
| 5  |                            |                      |                                                                                                                                                                                                                                                                      |     |
| 6  |                            |                      |                                                                                                                                                                                                                                                                      |     |
| 7  | Eligibility criteria       | <a href="#">#6b</a>  | For matched studies, give matching criteria and number of exposed and unexposed                                                                                                                                                                                      | 6-7 |
| 8  |                            |                      |                                                                                                                                                                                                                                                                      |     |
| 9  |                            |                      |                                                                                                                                                                                                                                                                      |     |
| 10 |                            |                      |                                                                                                                                                                                                                                                                      |     |
| 11 | Variables                  | <a href="#">#7</a>   | Clearly define all outcomes, exposures, predictors, potential confounders, and effect modifiers. Give diagnostic criteria, if applicable                                                                                                                             | 7   |
| 12 |                            |                      |                                                                                                                                                                                                                                                                      |     |
| 13 |                            |                      |                                                                                                                                                                                                                                                                      |     |
| 14 |                            |                      |                                                                                                                                                                                                                                                                      |     |
| 15 |                            |                      |                                                                                                                                                                                                                                                                      |     |
| 16 |                            |                      |                                                                                                                                                                                                                                                                      |     |
| 17 | Data sources / measurement | <a href="#">#8</a>   | For each variable of interest give sources of data and details of methods of assessment (measurement). Describe comparability of assessment methods if there is more than one group. Give information separately for for exposed and unexposed groups if applicable. | 7   |
| 18 |                            |                      |                                                                                                                                                                                                                                                                      |     |
| 19 |                            |                      |                                                                                                                                                                                                                                                                      |     |
| 20 |                            |                      |                                                                                                                                                                                                                                                                      |     |
| 21 |                            |                      |                                                                                                                                                                                                                                                                      |     |
| 22 |                            |                      |                                                                                                                                                                                                                                                                      |     |
| 23 |                            |                      |                                                                                                                                                                                                                                                                      |     |
| 24 |                            |                      |                                                                                                                                                                                                                                                                      |     |
| 25 |                            |                      |                                                                                                                                                                                                                                                                      |     |
| 26 | Bias                       | <a href="#">#9</a>   | Describe any efforts to address potential sources of bias                                                                                                                                                                                                            | 7   |
| 27 |                            |                      |                                                                                                                                                                                                                                                                      |     |
| 28 | Study size                 | <a href="#">#10</a>  | Explain how the study size was arrived at                                                                                                                                                                                                                            | 7   |
| 29 |                            |                      |                                                                                                                                                                                                                                                                      |     |
| 30 | Quantitative variables     | <a href="#">#11</a>  | Explain how quantitative variables were handled in the analyses. If applicable, describe which groupings were chosen, and why                                                                                                                                        | 8   |
| 31 |                            |                      |                                                                                                                                                                                                                                                                      |     |
| 32 |                            |                      |                                                                                                                                                                                                                                                                      |     |
| 33 |                            |                      |                                                                                                                                                                                                                                                                      |     |
| 34 | Statistical methods        | <a href="#">#12a</a> | Describe all statistical methods, including those used to control for confounding                                                                                                                                                                                    |     |
| 35 |                            |                      |                                                                                                                                                                                                                                                                      |     |
| 36 |                            |                      |                                                                                                                                                                                                                                                                      |     |
| 37 |                            |                      |                                                                                                                                                                                                                                                                      |     |
| 38 | 8                          |                      |                                                                                                                                                                                                                                                                      |     |
| 39 |                            |                      |                                                                                                                                                                                                                                                                      |     |
| 40 | Statistical methods        | <a href="#">#12b</a> | Describe any methods used to examine subgroups and interactions                                                                                                                                                                                                      | 8   |
| 41 |                            |                      |                                                                                                                                                                                                                                                                      |     |
| 42 |                            |                      |                                                                                                                                                                                                                                                                      |     |
| 43 |                            |                      |                                                                                                                                                                                                                                                                      |     |
| 44 | Statistical methods        | <a href="#">#12c</a> | Explain how missing data were addressed                                                                                                                                                                                                                              | 8   |
| 45 |                            |                      |                                                                                                                                                                                                                                                                      |     |
| 46 |                            |                      |                                                                                                                                                                                                                                                                      |     |
| 47 |                            |                      |                                                                                                                                                                                                                                                                      |     |
| 48 | Statistical methods        | <a href="#">#12d</a> | If applicable, explain how loss to follow-up was addressed                                                                                                                                                                                                           | 8   |
| 49 |                            |                      |                                                                                                                                                                                                                                                                      |     |
| 50 |                            |                      |                                                                                                                                                                                                                                                                      |     |
| 51 |                            |                      |                                                                                                                                                                                                                                                                      |     |
| 52 | Statistical methods        | <a href="#">#12e</a> | Describe any sensitivity analyses                                                                                                                                                                                                                                    |     |
| 53 |                            |                      |                                                                                                                                                                                                                                                                      |     |
| 54 |                            |                      |                                                                                                                                                                                                                                                                      |     |
| 55 |                            |                      |                                                                                                                                                                                                                                                                      |     |
| 56 | 8                          |                      |                                                                                                                                                                                                                                                                      |     |
| 57 |                            |                      |                                                                                                                                                                                                                                                                      |     |

## Results



|    |                  |                      |                                                                            |          |
|----|------------------|----------------------|----------------------------------------------------------------------------|----------|
| 1  | Participants     | <a href="#">#13a</a> | Report numbers of individuals at each stage of study—eg numbers            | 9        |
| 2  |                  |                      | potentially eligible, examined for eligibility, confirmed eligible,        |          |
| 3  |                  |                      | included in the study, completing follow-up, and analysed. Give            |          |
| 4  |                  |                      | information separately for for exposed and unexposed groups if             |          |
| 5  |                  |                      | applicable.                                                                |          |
| 6  |                  |                      |                                                                            |          |
| 7  |                  |                      |                                                                            |          |
| 8  |                  |                      |                                                                            |          |
| 9  | Participants     | <a href="#">#13b</a> | Give reasons for non-participation at each stage                           | 9        |
| 10 |                  |                      |                                                                            |          |
| 11 | Participants     | <a href="#">#13c</a> | Consider use of a flow diagram                                             |          |
| 12 |                  |                      |                                                                            |          |
| 13 |                  |                      |                                                                            |          |
| 14 | 27               |                      |                                                                            |          |
| 15 |                  |                      |                                                                            |          |
| 16 | Descriptive data | <a href="#">#14a</a> | Give characteristics of study participants (eg demographic, clinical,      | 9, 21-22 |
| 17 |                  |                      | social) and information on exposures and potential confounders. Give       |          |
| 18 |                  |                      | information separately for exposed and unexposed groups if                 |          |
| 19 |                  |                      | applicable.                                                                |          |
| 20 |                  |                      |                                                                            |          |
| 21 |                  |                      |                                                                            |          |
| 22 |                  |                      |                                                                            |          |
| 23 | Descriptive data | <a href="#">#14b</a> | Indicate number of participants with missing data for each variable of     |          |
| 24 |                  |                      | interest                                                                   |          |
| 25 |                  |                      |                                                                            |          |
| 26 |                  |                      |                                                                            |          |
| 27 | 6-7, 27          |                      |                                                                            |          |
| 28 |                  |                      |                                                                            |          |
| 29 | Descriptive data | <a href="#">#14c</a> | Summarise follow-up time (eg, average and total amount)                    |          |
| 30 |                  |                      |                                                                            |          |
| 31 | 9                |                      |                                                                            |          |
| 32 |                  |                      |                                                                            |          |
| 33 |                  |                      |                                                                            |          |
| 34 | Outcome data     | <a href="#">#15</a>  | Report numbers of outcome events or summary measures over time.            |          |
| 35 |                  |                      | Give information separately for exposed and unexposed groups if            |          |
| 36 |                  |                      | applicable.                                                                |          |
| 37 |                  |                      |                                                                            |          |
| 38 |                  |                      |                                                                            |          |
| 39 | 9-10             |                      |                                                                            |          |
| 40 |                  |                      |                                                                            |          |
| 41 | Main results     | <a href="#">#16a</a> | Give unadjusted estimates and, if applicable, confounder-adjusted          | 9-10     |
| 42 |                  |                      | estimates and their precision (eg, 95% confidence interval). Make          |          |
| 43 |                  |                      | clear which confounders were adjusted for and why they were                |          |
| 44 |                  |                      | included                                                                   |          |
| 45 |                  |                      |                                                                            |          |
| 46 |                  |                      |                                                                            |          |
| 47 |                  |                      |                                                                            |          |
| 48 | Main results     | <a href="#">#16b</a> | Report category boundaries when continuous variables were                  | 9        |
| 49 |                  |                      | categorized                                                                |          |
| 50 |                  |                      |                                                                            |          |
| 51 |                  |                      |                                                                            |          |
| 52 | Main results     | <a href="#">#16c</a> | If relevant, consider translating estimates of relative risk into absolute |          |
| 53 |                  |                      | risk for a meaningful time period                                          |          |
| 54 |                  |                      |                                                                            |          |
| 55 |                  |                      |                                                                            |          |
| 56 | 9-10             |                      |                                                                            |          |
| 57 |                  |                      |                                                                            |          |
| 58 |                  |                      |                                                                            |          |
| 59 |                  |                      |                                                                            |          |
| 60 |                  |                      |                                                                            |          |

|    |                    |                     |                                                                                                                                                                  |       |
|----|--------------------|---------------------|------------------------------------------------------------------------------------------------------------------------------------------------------------------|-------|
| 1  | Other analyses     | <a href="#">#17</a> | Report other analyses done—eg analyses of subgroups and interactions, and sensitivity analyses                                                                   | 10    |
| 2  |                    |                     |                                                                                                                                                                  |       |
| 3  |                    |                     |                                                                                                                                                                  |       |
| 4  |                    |                     |                                                                                                                                                                  |       |
| 5  | <b>Discussion</b>  |                     |                                                                                                                                                                  |       |
| 6  |                    |                     |                                                                                                                                                                  |       |
| 7  | Key results        | <a href="#">#18</a> | Summarise key results with reference to study objectives                                                                                                         | 10    |
| 8  |                    |                     |                                                                                                                                                                  |       |
| 9  | Limitations        | <a href="#">#19</a> | Discuss limitations of the study, taking into account sources of potential bias or imprecision. Discuss both direction and magnitude of any potential bias.      | 11    |
| 10 |                    |                     |                                                                                                                                                                  |       |
| 11 |                    |                     |                                                                                                                                                                  |       |
| 12 |                    |                     |                                                                                                                                                                  |       |
| 13 |                    |                     |                                                                                                                                                                  |       |
| 14 |                    |                     |                                                                                                                                                                  |       |
| 15 | Interpretation     | <a href="#">#20</a> | Give a cautious overall interpretation considering objectives, limitations, multiplicity of analyses, results from similar studies, and other relevant evidence. | 10-11 |
| 16 |                    |                     |                                                                                                                                                                  |       |
| 17 |                    |                     |                                                                                                                                                                  |       |
| 18 |                    |                     |                                                                                                                                                                  |       |
| 19 |                    |                     |                                                                                                                                                                  |       |
| 20 | Generalisability   | <a href="#">#21</a> | Discuss the generalisability (external validity) of the study results                                                                                            | 11-12 |
| 21 |                    |                     |                                                                                                                                                                  |       |
| 22 |                    |                     |                                                                                                                                                                  |       |
| 23 | <b>Other</b>       |                     |                                                                                                                                                                  |       |
| 24 | <b>Information</b> |                     |                                                                                                                                                                  |       |
| 25 |                    |                     |                                                                                                                                                                  |       |
| 26 | Funding            | <a href="#">#22</a> | Give the source of funding and the role of the funders for the present study and, if applicable, for the original study on which the present article is based    | 13-14 |
| 27 |                    |                     |                                                                                                                                                                  |       |
| 28 |                    |                     |                                                                                                                                                                  |       |
| 29 |                    |                     |                                                                                                                                                                  |       |
| 30 |                    |                     |                                                                                                                                                                  |       |

31 The STROBE checklist is distributed under the terms of the Creative Commons Attribution License CC-BY.  
 32 This checklist was completed on 29. November 2021 using <https://www.goodreports.org/>, a tool made by the  
 33 [EQUATOR Network](#) in collaboration with [Penelope.ai](#)  
 34  
 35  
 36  
 37  
 38  
 39  
 40  
 41  
 42  
 43  
 44  
 45  
 46  
 47  
 48  
 49  
 50  
 51  
 52  
 53  
 54  
 55  
 56  
 57  
 58  
 59  
 60

# BMJ Open

## Purpose in life (Ikigai) and employment status in relation to cardiovascular mortality: the Japan Collaborative Cohort Study

|                                 |                                                                                                                                                                                                                                                                                                                                                                                                                                                                                                                                                                                                      |
|---------------------------------|------------------------------------------------------------------------------------------------------------------------------------------------------------------------------------------------------------------------------------------------------------------------------------------------------------------------------------------------------------------------------------------------------------------------------------------------------------------------------------------------------------------------------------------------------------------------------------------------------|
| Journal:                        | <i>BMJ Open</i>                                                                                                                                                                                                                                                                                                                                                                                                                                                                                                                                                                                      |
| Manuscript ID                   | bmjopen-2021-059725.R1                                                                                                                                                                                                                                                                                                                                                                                                                                                                                                                                                                               |
| Article Type:                   | Original research                                                                                                                                                                                                                                                                                                                                                                                                                                                                                                                                                                                    |
| Date Submitted by the Author:   | 11-May-2022                                                                                                                                                                                                                                                                                                                                                                                                                                                                                                                                                                                          |
| Complete List of Authors:       | Miyazaki, Junji; Osaka University, Public Health, Department of Social Medicine, Graduate School of Medicine<br>Shirai, Kokoro; Osaka University, Public Health, Department of Social Medicine, Graduate School of Medicine<br>Kimura, Takashi; Hokkaido University, Department of Public Health<br>Ikehara, Satoyo; Osaka University, Public Health, Department of Social Medicine, Graduate School of Medicine<br>Tamakoshi, Akiko; Hokkaido University, Department of Public Health<br>Iso, Hiroyasu; Osaka University, Public Health, Department of Social Medicine, Graduate School of Medicine |
| <b>Primary Subject Heading</b>: | Epidemiology                                                                                                                                                                                                                                                                                                                                                                                                                                                                                                                                                                                         |
| Secondary Subject Heading:      | Public health                                                                                                                                                                                                                                                                                                                                                                                                                                                                                                                                                                                        |
| Keywords:                       | EPIDEMIOLOGY, OCCUPATIONAL & INDUSTRIAL MEDICINE, SOCIAL MEDICINE, STROKE MEDICINE, Coronary heart disease < CARDIOLOGY                                                                                                                                                                                                                                                                                                                                                                                                                                                                              |
|                                 |                                                                                                                                                                                                                                                                                                                                                                                                                                                                                                                                                                                                      |

SCHOLARONE™  
Manuscripts



I, the Submitting Author has the right to grant and does grant on behalf of all authors of the Work (as defined in the below author licence), an exclusive licence and/or a non-exclusive licence for contributions from authors who are: i) UK Crown employees; ii) where BMJ has agreed a CC-BY licence shall apply, and/or iii) in accordance with the terms applicable for US Federal Government officers or employees acting as part of their official duties; on a worldwide, perpetual, irrevocable, royalty-free basis to BMJ Publishing Group Ltd ("BMJ") its licensees and where the relevant Journal is co-owned by BMJ to the co-owners of the Journal, to publish the Work in this journal and any other BMJ products and to exploit all rights, as set out in our [licence](#).

The Submitting Author accepts and understands that any supply made under these terms is made by BMJ to the Submitting Author unless you are acting as an employee on behalf of your employer or a postgraduate student of an affiliated institution which is paying any applicable article publishing charge ("APC") for Open Access articles. Where the Submitting Author wishes to make the Work available on an Open Access basis (and intends to pay the relevant APC), the terms of reuse of such Open Access shall be governed by a Creative Commons licence – details of these licences and which [Creative Commons](#) licence will apply to this Work are set out in our licence referred to above.

Other than as permitted in any relevant BMJ Author's Self Archiving Policies, I confirm this Work has not been accepted for publication elsewhere, is not being considered for publication elsewhere and does not duplicate material already published. I confirm all authors consent to publication of this Work and authorise the granting of this licence.

1  
2  
3 1 **TITLE**  
4

5 2 Purpose in life (*Ikigai*) and employment status in relation to cardiovascular mortality: the Japan Collaborative  
6  
7  
8 3 Cohort Study  
9

10 4  
11  
12 5 **AUTHOR NAMES AND AFFILIATIONS**  
13

14 6 Junji Miyazaki<sup>1</sup>, Kokoro Shirai<sup>1</sup>, Takashi Kimura<sup>2</sup>, Satoyo Ikehara<sup>1</sup>, Akiko Tamakoshi<sup>2</sup>, Hiroyasu Iso<sup>\*1</sup>  
15  
16

17 7  
18  
19 8 <sup>1</sup> Public Health, Department of Social Medicine, Osaka University Graduate School of Medicine, 2-2  
20  
21 9 Yamadaoka, Suita, Osaka, Japan  
22  
23

24 10 <sup>2</sup> Department of Public Health, Faculty of Medicine, Hokkaido University, Kita 8, Nishi 5, Kita-ku,  
25  
26 11 Sapporo, Japan  
27  
28  
29 12

30  
31 13 **CORRESPONDING AUTHOR**  
32

33 14 \* Correspondence to Hiroyasu Iso Public Health, Department of Social Medicine, Osaka University Graduate  
34  
35 15 School of Medicine, 2-2 Yamadaoka, Suita, Osaka 565-0871, Japan. E-mail iso@pbhel.med.osaka-u.ac.jp  
36  
37  
38 16  
39

40 17 **KEYWORDS**  
41

42 18 purpose in life (*Ikigai*), employment status, cardiovascular disease, stroke, coronary heart disease, mortality,  
43  
44 19 prospective study  
45  
46  
47 20  
48

49 21 **NUMBER OF TABLES**  
50

51 22 One figure and four tables  
52  
53  
54 23  
55

56 24 **ORCID**  
57

58 25 ID: 0000-0003-3634-6401  
59  
60

1  
2  
3 26  
4  
5  
6 27  
7  
8 28  
9  
10 29  
11  
12 30  
13  
14  
15  
16  
17  
18  
19  
20  
21  
22  
23  
24  
25  
26  
27  
28  
29  
30  
31  
32  
33  
34  
35  
36  
37  
38  
39  
40  
41  
42  
43  
44  
45  
46  
47  
48  
49  
50  
51  
52  
53  
54  
55  
56  
57  
58  
59  
60

**WORD COUNT**

237 words (abstract)

2,614 words (without references)

For peer review only

1  
2  
3 **32 Abstract**  
4

5 **33 Objectives:** To investigate whether having a purpose in life (*Ikigai*) is associated with risk of cardiovascular  
6  
7  
8 **34** disease mortality and whether the association varies by employment status.  
9

10 **35 Design:** Prospective cohort study  
11

12 **36 Setting:** Residents in 45 municipalities, Japan.  
13

14  
15 **37 Participants:** 29 517 men and 41 984 women aged 40 to 79 years, free of cardiovascular disease (CVD) and  
16  
17 **38** cancer at baseline from 1988 to 1990.  
18

19 **39 Primary outcome measures:** CVD mortality  
20

21  
22 **40 Results:** During the median follow-up of 19.1 years, 4 680 deaths (2 393 men and 2 287 women) from total  
23  
24 **41** CVD were observed. Greater *Ikigai* was associated with a lower risk of CVD mortality, and the result was  
25  
26 **42** stronger for men than for women. Stratified by employment status, the inverse association was confined to  
27  
28 **43** unemployed persons. Among unemployed persons, the multivariable HRs of total CVD were higher for  
29  
30 moderate and high versus low levels of *Ikigai*. Multivariable HRs (95% CIs) were 0.74 (0.57 to 0.97) and 0.69  
31 **44**  
32 (0.52 to 0.93), P for trend < 0.044, respectively in men, and 0.78 (0.64 to 0.95) and 0.77 (0.61 to 0.97), P for  
33 **45**  
34 trend = 0.039 in women. No association was observed among the employed, including part-time workers, self-  
35 **46**  
36 employed, and homemakers for both men and women. Such an inverse association remained even after  
37  
38 **47** excluding early deaths within five years from the baseline survey.  
39  
40 **48**

41  
42 **49 Conclusion:** Higher levels of *Ikigai* were associated with a lower risk of CVD mortality, especially for  
43  
44 **50** unemployed men and women.  
45  
46  
47 **51**  
48  
49  
50  
51  
52  
53  
54  
55  
56  
57  
58  
59  
60

1  
2  
3  
4  
5  
6  
7  
8  
9  
10  
11  
12  
13  
14  
15  
16  
17  
18  
19  
20  
21  
22  
23  
24  
25  
26  
27  
28  
29  
30  
31  
32  
33  
34  
35  
36  
37  
38  
39  
40  
41  
42  
43  
44  
45  
46  
47  
48  
49  
50  
51  
52  
53  
54  
55  
56  
57  
58  
59  
60

## 52 **Article Summary**

### 53 **Strengths and limitations of this study**

54 - Strengths included a population-based cohort study, a large sample size, and a long follow-up period.

55 - Another strength was the adjustment for many confounding factors including lifestyle habits, social and  
56 psychological factors, and past medical histories such as hypertension and diabetes mellitus.

57 - Limitation was a self-administered single-item questionnaire on the purpose in life (*Ikigai*) to assess exposure at  
58 the baseline survey.

For peer review only



## 59 Introduction

60 Recently, there has been growing evidence that positive psychological factors, such as life satisfaction,  
61 happiness, life enjoyment, optimism, and purpose in life have been associated with favorable health outcomes,  
62 including reduced risk of cardiovascular disease, in activities of daily living, cognitive impairment, and all-cause  
63 mortality.<sup>1-6</sup> A meta-analysis of 17 studies (mainly from the United States, Canada, and Europe) reported that  
64 psychological factors, such as meaning in life, purpose of life, life satisfaction, positive affect, and self-esteem,  
65 were considered essential components of well-being.<sup>7</sup> In another meta-analysis, high life purpose was associated  
66 with a 17% lower risk of all-cause mortality and cardiovascular events such as myocardial infarction, cardiac  
67 death, and stroke.<sup>8</sup>

68 "*Ikigai*" is a Japanese concept similar to "purpose in life," "meaning of life," "life worth living," and  
69 "reason to live," which can be translated as "that which most makes one's life seem worth living".<sup>9</sup> In Japanese,  
70 *Ikigai* is defined as a comprehensive concept related to life satisfaction, self-esteem, self-efficacy, morale, and  
71 cognitive evaluation of the meaning of one's life.<sup>10</sup> *Ikigai* involves more than enjoyment, pleasure, or happiness  
72 and provides significance for one's value in life, including subjective motivation for a living.<sup>11</sup> In a previous  
73 prospective cohort study of 43 391 Japanese adults over 7-years' follow-up, the presence of a sense of *Ikigai* was  
74 associated with decreased risk of all-cause and cardiovascular mortality among middle-aged and elderly  
75 Japanese men and women.<sup>12</sup> A panel study of 6 739 US adults aged 53 to 105 years over a four-year follow-up  
76 showed that a higher level of purpose in life was associated with a 22% reduced incidence of stroke after  
77 adjustment for age, gender, race/ethnicity, and socioeconomic status.<sup>13</sup>

78 A meta-analysis of 42 cross-sectional and prospective cohort studies providing data on more than 20  
79 million people showed that unemployment was associated with an increased risk of all-cause mortality, with a  
80 63% higher risk for those who experienced unemployment than those who did not.<sup>14</sup> Unemployment status was  
81 associated with an increased incidence of cardiovascular events such as coronary heart disease and stroke  
82 associated with.<sup>15-17</sup> A study based on a population-wide dataset of 3 084 137 Belgian individuals aged 25 to 59  
83 at the 2001 census showed that unemployment status was associated with health problems such as

1  
2  
3 84 cardiovascular, endocrine, and psychiatric disorders.<sup>18</sup> According to a study of 297 construction workers  
4  
5 85 followed for two years, the longer the unemployment, the greater rise in blood pressure levels.<sup>19</sup> Poor health is a  
6  
7 86 direct or indirect consequence of unemployment, and this causal relationship was mediated by health behaviors  
8  
9  
10 87 such as tobacco or alcohol consumption.<sup>20-23</sup>  
11

12 88 No study, however, has focused on the impact of *Ikigai* on mortality risk by employment status. We  
13  
14  
15 89 hypothesize that *Ikigai* positively impacts cardiovascular health even in an unemployed situation. We aimed to  
16  
17 90 test this hypothesis using a long-term follow-up of a large-scale prospective cohort study of Japanese adults.  
18  
19 91

## 21 92 **Methods**

### 24 93 **Study population**

25  
26 94 The Japan Collaborative Cohort Study for the Evaluation of Cancer Risks (JACC study) enrolled residents in 45  
27  
28 95 area around Japan between 1988 and 1990. Participants were required to conduct self-administered  
29  
30  
31 96 questionnaires about their lifestyle and previous medical history concerning cardiovascular disease (CVD) and  
32  
33 97 cancer at baseline. The details of the study procedure are described elsewhere.<sup>24</sup> Briefly, a total of 1 10 585  
34  
35 98 subjects (46 395 men and 64 190 women) aged 40 to 79 years old participated in the JACC study at the baseline  
36  
37  
38 99 survey. Among the participants, 7 692 were excluded due to a past history of CVD or cancer at baseline.  
39  
40 100 Additionally, we excluded 31 392 excluded for 25 730 participants in areas with no questions about *Ikigai* and 5  
41  
42 101 662 participants who lacked information about *Ikigai*. Finally, 71 501 subjects (29 517 men and 41 984 women)  
43  
44  
45 102 were eligible for inclusion in the analyses (Figure 1). Prior to the completion of the questionnaire, the  
46  
47 103 participants were provided informed consent to be involved in this epidemiological study. Individual informed  
48  
49 104 consent was obtained from each participant in 36 out of the 45 study areas (written consent in 35 areas and oral  
50  
51 105 consent in 1 area). In the remaining nine areas, group consent was obtained from each community  
52  
53  
54 106 representative. Ethical approval for the present study was given by the ethical committees of Osaka University  
55  
56 107 and Hokkaido University.  
57  
58 108  
59  
60

### 109 **Mortality surveillance**

110 The date and cause of death for participants were determined by reviewing all death certificates from each area.  
111 According to the International Classification of Diseases, 10th revision, cause-specific mortality was defined  
112 within total CVD mortality (I01 to I99). Type-specific CVD mortality was defined as I60.0 to I69.8 for total  
113 stroke, I20.0 to I25.5 for coronary heart disease, I50.0 to I50.9 for heart failure, and other CVDs. Total stroke  
114 was divided into three subtypes: cerebral infarction (I63.0 to I63.9), hemorrhagic stroke (I60.0 to I61.9), and  
115 stroke of undetermined type (I62.0 to I62.9 and I64 to I69.8). From baseline until December 31, 2009, a total of  
116 15 801 participants were censored because of death, and 3 986 were censored because they moved out of their  
117 original residential area; follow-up was terminated at the end of 1999 (four areas), 2003 (four areas), and 2008  
118 (two areas). The median follow-up period was 19.1 years (interquartile range, 10.4 to 20.7).

### 120 **Baseline Measurement**

121 At baseline, we used a self-administered questionnaire to obtain information on age, body mass index (BMI)  
122 (calculated by dividing body weight in kilograms by height squared in meters), smoking status, alcohol  
123 consumption, sleep duration, walking time per day, sports activity time per week, education level, marital status,  
124 employment status, and psychological conditions such as *Ikigai*, perceived mental stress, sense of life  
125 enjoyment, and medical history of hypertension and diabetes mellitus. *Ikigai* was assessed using the question  
126 ‘How much *Ikigai* do you feel in your daily life?’ and responses were assessed using a four-point Likert scale:  
127 ‘low,’ ‘moderate,’ ‘high,’ and ‘very high.’ We collapsed ‘very high’ into ‘high’ for the analyses, as did previous  
128 studies.<sup>25,26</sup> Other psychological conditions were evaluated by single-item questions using four points  
129 Likert scale.

### 131 **Statistical analysis**

132 For each participant, we calculated the person-years of follow-up from the baseline surveys between 1988 and  
133 1990 to the first endpoint of death, moving from the community, or the end of 2009. Mortality rates for CVD

1  
2  
3 134 were estimated according to the perceived levels of *Ikigai* at baseline. We compared sex-specific and age-  
4  
5 135 adjusted mean or prevalence of baseline risk characteristics according to perceived levels of *Ikigai* among  
6  
7  
8 136 participants using the linear regression or mantel-haenszel test.  
9

10 137 The analysis used a Cox proportional hazards model to calculate sex-specific hazard ratios  
11  
12 138 (HRs) and 95% confidence intervals (CIs) of CVD according to perceived levels of *Ikigai* at baseline  
13  
14  
15 139 and the risk of mortality from CVD at follow-up. The adjustment was done for age and then for other  
16  
17 140 potential confounders: BMI (< 18.5, 18.5 to <25.0, 25.0 to 30.0, 30.0 to 35.0, and  $\geq 35.0$  kg/m<sup>2</sup>),  
18  
19 141 smoking status (never, ex-smoker, and current smoker), alcohol consumption (never, ex-drinker, 1–20 and  $\geq 20.0$   
20  
21 142 g ethanol per day), sports activity time per week (almost never, 1–2, 3–4 and  $\geq 5$  hour per week), walking time  
22  
23  
24 143 per day (almost never, 0.5, 0.6–0.9, and  $\geq 1$  hour per day), education levels (<13, 13–15, 16–18, and  $\geq 19$  years),  
25  
26 144 marital status (living with a spouse, divorced, bereaved and single), sleep duration per day (<5, 5, 6, 7, 8, 9 and  
27  
28 145  $\geq 10$  hour per day), perceived mental stress (low, moderate, high, very high), sense of life enjoyment (always,  
29  
30  
31 146 sometimes, moderate, never) and medical history of hypertension and diabetes (yes or no). Missing values for  
32  
33 147 these covariates were treated as additional missing categories, and the model contained these dummy variables.  
34  
35 148 Furthermore, the stratified analysis was performed for six categories of employment status; employed, self-  
36  
37  
38 149 employed, part-time workers, homemakers, unemployed, and others. Homemakers were regarded as the  
39  
40 150 category of employed because they were primarily women, and many of them were assumed to have motivation  
41  
42 151 for children and housework in Japan. In addition, we conducted a sensitivity analysis to exclude those who died  
43  
44  
45 152 early and those who moved and were censored in the first five years of follow-up and the type-specific CVD  
46  
47 153 analysis for total stroke, ischemic stroke, hemorrhagic stroke, stroke of undetermined type, coronary heart  
48  
49 154 disease, heart failure, and other CVDs. To test for linear trends across the *Ikigai* categories for baseline risk  
50  
51 155 characteristics and hazard ratios, and ordering variable of *Ikigai* (1: low, 2: moderate, 3: high) was used.  
52  
53  
54 156 Probability values for statistical significance were two-tailed, and a *P*-value <0.05 was regarded as statistically  
55  
56 157 significant. The statistical analyses were carried out using SAS version 9.4 (SAS Institute Inc., Cary, NC, USA).  
57

## 58 158 **Patient and Public Involvement**

59  
60

1  
2  
3 159 Patients and/or the public were not involved in the design, conduct, reporting, or dissemination plans of this  
4  
5  
6 160 research.

## 10 162 **Results**

11  
12 163 During a follow-up of 1 160 648 person-years, the deaths of 4 680 (men and women: 2 393 and 2 287) due to  
13  
14  
15 164 total CVD were documented. Other deaths from major CVD types were 2 053 (1 047 and 1 006) total strokes,  
16  
17 165 716 (398 and 318) ischemic strokes, 739 (344 and 395) hemorrhagic strokes, 598 (305 and 293) strokes of  
18  
19 166 undetermined type, 975 (550 and 425) coronary heart diseases, 792 (361 and 431) heart failures, and 860 (435  
20  
21  
22 167 and 425) other CVDs.

23  
24 168 Table 1 shows the mean values or prevalence of cardiovascular risk factors and health behaviors at  
25  
26 169 baseline according to *Ikigai* level. In both men and women, those with high *Ikigai* tended to have higher levels of  
27  
28  
29 170 the following factors: BMI, self-employed, higher education ( $\geq 16$  years), current alcohol consumption, never  
30  
31 171 smoking, living with a spouse, sports activity ( $\geq 1$ -2 h/week), walking time ( $\geq 1$  h/day), low perceived mental  
32  
33 172 stress and high life enjoyment. Unlike men, women with high *Ikigai* tended to be employed or part-time  
34  
35 173 workers.

36  
37  
38 174 Table 2 shows the sex-specific risk of mortality from total CVD according to the level of *Ikigai*,  
39  
40 175 stratified by employment status. Men who had moderate and high *Ikigai* had a lower risk of mortality from total  
41  
42 176 CVD than those with low *Ikigai*. Multivariable HRs (95% CIs) were 0.80 (0.68 to 0.93) and 0.74 (0.64 to 0.87);  
43  
44  
45 177 *P* for trend  $< 0.001$ , respectively. A similar inverse association was observed among unemployed men,  
46  
47 178 multivariable HRs (95% CIs) were 0.74 (0.57 to 0.97) and 0.69 (0.52 to 0.93); *P* for trend = 0.044, respectively.  
48  
49 179 Women who had moderate and high *Ikigai* levels tended to have a lower risk of mortality from total CVD than  
50  
51 180 those with low *Ikigai*. But, tests for trend were not statistically significant: multivariable HRs (95% CI) were  
52  
53  
54 181 0.87 (0.75 to 1.00) and 0.88 (0.76 to 1.03); *P* for trend = 0.136, respectively. Among unemployed women, those  
55  
56 182 who had moderate and high *Ikigai* had a lower risk of mortality from total CVD than those who had low *Ikigai*;  
57  
58 183 tests for trend were statistically significant: multivariable HRs (95% CI) were 0.78 (0.64 to 0.95) and 0.77 (0.61  
59  
60

1  
2  
3 184 to 0.97);  $P$  for trend = 0.039, respectively. No associations were observed among the unemployed, including  
4  
5 185 part-time workers, self-employed, and homemakers for both men and women.  
6

7  
8 186 Table 3 shows the sensitivity analysis in which we censored individuals who died and those who moved  
9  
10 187 during the first five years of follow-up, having excluded individuals who had an early death. The inverse  
11  
12 188 associations did not differ materially for both men and women.  
13

14  
15 189 Table 4 shows the risk of mortality from CVD types according to the perceived levels of *Ikigai* among  
16  
17 190 the unemployed. Unemployed men and women with high *Ikigai* had lower risks of mortality from total stroke,  
18  
19 191 stroke subtypes (ischemic stroke, hemorrhagic stroke, and stroke of determined type), coronary heart disease,  
20  
21 heart failure, and other CVDs than those with low *Ikigai*. After adjusting for CVD risk factors, the inverse  
22 192 association remained statistically significant for total stroke, stroke of determined type, and coronary heart  
23  
24 193 disease.  
25  
26 194  
27

## 28 195 29 30 31 196 **Discussion**

32  
33 197 In a large prospective cohort study, higher levels of *Ikigai* were associated with a lower risk of mortality from  
34  
35 198 total CVD among unemployed men and women after adjustment for known cardiovascular risk factors, but such  
36  
37 as inverse association was not observed for the employed. The lower risk of CVD mortality among the  
38 199 unemployed was observed even after excluding early deaths within five years from the baseline survey.  
39  
40 200 Furthermore, the risk reduction was evident for total stroke and coronary heart disease among the unemployed  
41  
42 201 people.  
43  
44 202  
45

46  
47 203 The underlying biological mechanisms for the potential preventive effect of *Ikigai* on mortality from  
48  
49 204 CVD remained unclear, but some reasons have been addressed. Elevated levels of inflammatory markers such  
50  
51 205 as C-reactive protein and interleukin-6 were associated with an increased CVD risk.<sup>27-29</sup> A previous study using  
52  
53 data from a 10-year panel survey of 985 adults aged 25 to 74 years residing in the United States showed that  
54 206 people with a higher purpose in life had lower physiological function scores, calculated by summarizing  
55  
56 207 biomarkers such as resting blood pressure, heart rate variability, low-density lipoprotein cholesterol, glycosylated  
57  
58 208  
59  
60

1  
2  
3 209 hemoglobin, plasma C-reactive protein, interleukin-6, urinary measures of epinephrine/norepinephrine and  
4  
5 210 cortisol levels.<sup>30</sup> Another study of 135 older women aged 61 to 91 years found that those with higher scores of  
6  
7  
8 211 purpose in life had lower levels of the soluble IL-6 receptor, an inflammatory marker for stroke, coronary heart  
9  
10 212 disease as well as rheumatoid arthritis and Alzheimer's disease.<sup>31</sup>

11  
12 213 Two other prospective cohort studies using 9.1-year follow-up data for 941 persons and 6-year follow-  
13  
14  
15 214 up data for 2 478 persons showed that the risk reductions associated with positive psychological factors in all-  
16  
17 215 cause mortality and stroke incidence were stronger in men than in women.<sup>32 33</sup> A previous report of the JACC  
18  
19 216 study with a 12.5-year follow-up showed that men with higher *Ikigai* had a reduced risk of CVD mortality but  
20  
21  
22 217 not women.<sup>34</sup> We observed a similar inverse association of CVD mortality risk in the present study and extended  
23  
24 218 the evidence that the inverse association between *Ikigai* and CVD mortality risk was confined to unemployed  
25  
26 219 men and women.

27  
28 220 The present study has several strengths compared to previous studies. First, a population-based cohort  
29  
30  
31 221 study with a large sample size and a more extended follow-up period allowed us to assess the risk of  
32  
33 222 cardiovascular mortality according to the perceived levels of *Ikigai*, stratified by employment status. Second, we  
34  
35 223 adjusted for many confounding factors including lifestyle habits, social and psychological factors, and past  
36  
37  
38 224 medical histories such as hypertension and diabetes mellitus. There were some limitations to our study. First,  
39  
40 225 psychological factors such as *Ikigai* were evaluated by a self-administered single-item questionnaire. It has been  
41  
42 226 noted that *Ikigai* encompasses not only eudaimonic well-being, i.e., well-being that pertains to internal virtue and  
43  
44  
45 227 pursuing human capacity<sup>35</sup>, but also aspects of hedonic well-being characterized by pleasure and satisfaction not  
46  
47 228 necessarily resulting from a virtuous activity<sup>36</sup>. Unemployed persons with *Ikigai* were possibly likely to have  
48  
49 229 available eudaimonic or hedonic well-being in their daily lives. However, the present study did not provide  
50  
51  
52 230 information on the details of *Ikigai*. Second, the presence of illness and preclinical conditions may have  
53  
54 231 influenced *Ikigai* at baseline, which could lead to reverse causality. Therefore, we excluded histories of CVD  
55  
56 232 and cancer and also conducted a sensitivity analysis in which individuals who died or moved during the first five  
57  
58 233 years of follow-up were censored and found that the inverse association between *Ikigai* and the risk of CVD  
59  
60

1  
2  
3 234 mortality remained unchanged. Lastly, although we adjusted for numerous potential confounders, some  
4  
5 235 unmeasured confounders, such as the usage of medical services, may still be present. A previous study using a  
6  
7  
8 236 national panel study of 7 168 US adults showed that having a purpose in life was associated with a higher  
9  
10 237 likelihood of using health care services such as cholesterol tests, colonoscopies, mammogram/X-ray, pap smear,  
11  
12 238 and prostate examinations.<sup>37</sup>  
13

14  
15 239

## 17 240 **Conclusion**

18  
19 241 We found that higher levels of *Ikigai* were associated with a lower risk of CVD mortality, specifically for  
20  
21 242 unemployed men and women. Having *Ikigai* might be useful for the risk reduction of CVD mortality among the  
22  
23  
24 243 unemployed.  
25

26 244  
27

## 28 245 **Acknowledgments**

29  
30  
31 246 We express our sincere thanks to Drs. Kunio Aoki and Yoshiyuki Ohno, Professors Emeritus of the Nagoya  
32  
33 247 University School of Medicine and former chairpersons of the JACC Study. We are also greatly indebted to Dr.  
34  
35 248 Haruo Sugano, former Director of the Cancer Institute, Tokyo, who contributed greatly to the initiation of the  
36  
37  
38 249 JACC Study; to Dr. Tomoyuki Kitagawa, Director Emeritus of the Cancer Institute of the Japanese Foundation  
39  
40 250 for Cancer Research and former project leader of the Grant-in-Aid for Scientific Research on Priority Area'  
41  
42 251 Cancer'; and to Dr. Kazao Tajima, Aichi Cancer Center, who was the previous project leader of the Grant-in-Aid  
43  
44  
45 252 for Scientific Research on Priority Area of Cancer Epidemiology.

46  
47 253 Writing Committee Members for the JACC Study Group Dr. Akiko Tamakoshi (present chairperson of the  
48  
49 254 study group), Hokkaido University Graduate School of Medicine; Drs. Mitsuru Mori and Fumio Sakauchi,  
50  
51 255 Sapporo Medical University School of Medicine; Dr. Yutaka Motohashi, Akita University School of Medicine;  
52  
53  
54 256 Dr. Ichiro Tsuji, Tohoku University Graduate School of Medicine; Dr. Yoshikazu Nakamura, Jichi Medical  
55  
56 257 School; Dr. Hiroyasu Iso, Osaka University School of Medicine; Dr. Haruo Mikami, Chiba Cancer Center; Dr.  
57  
58 258 Michiko Kurosawa, Juntendo University School of Medicine; Dr. Yoshiharu Hoshiyama, Yokohama Soei  
59  
60



1  
2  
3 259 University; Dr. Naohito Tanabe, University of Niigata Prefecture; Dr. Koji Tamakoshi, Nagoya University  
4  
5 260 Graduate School of Health Science; Dr. Kenji Wakai, Nagoya University Graduate School of Medicine; Dr.  
6  
7  
8 261 Shinkan Tokudome, National Institute of Health and Nutrition; Dr. Koji Suzuki, Fujita Health University School  
9  
10 262 of Health Sciences; Dr. Shuji Hashimoto, Fujita Health University School of Medicine; Dr. Shogo Kikuchi,  
11  
12 263 Aichi Medical University School of Medicine; Dr. Yasuhiko Wada, Faculty of Nutrition, University of Kochi;  
13  
14  
15 264 Dr. Takashi Kawamura, Kyoto University Center for Student Health; Dr. Yoshiyuki Watanabe, Kyoto  
16  
17 265 Prefectural University of Medicine Graduate School of Medical Science; Dr. Kotaro Ozasa, Radiation Effects  
18  
19 266 Research Foundation; Dr. Tsuneharu Miki, Kyoto Prefectural University of Medicine Graduate School of  
20  
21 267 Medical Science; Dr. Chigusa Date, School of Human Science and Environment, University of Hyogo; Dr.  
22  
23  
24 268 Kiyomi Sakata, Iwate Medical University; Dr. Yoichi Kurozawa, Tottori University Faculty of Medicine; Drs.  
25  
26 269 Takesumi Yoshimura and Yoshihisa Fujino, University of Occupational and Environmental Health; Dr. Akira  
27  
28 270 Shibata, Kurume University; Dr. Naoyuki Okamoto, Kanagawa Cancer Center; and Dr. Hideo Shio, Moriyama  
29  
30  
31 271 Municipal Hospital.

32  
33 272  
34  
35 273 **Author Contributions** HI and AT conceived and designed the study; JM, and KS drafted the plan for the data  
36  
37 274 analyses; JM and TK conducted data analysis; SI and TK provided statistical expertise and interpreted the data;  
38  
39  
40 275 JM drafted the manuscript; HI and KS analyzed and interpreted the data, and critically revised the manuscript;  
41  
42 276 JM, KS, and HI had primary responsibility for final content; and all authors were involved in interpretation of the  
43  
44  
45 277 results and revision of the manuscript and approved the final version of the manuscripts. JM, KS, and HI are  
46  
47 278 guarantors.

48  
49 279 **Funding** This study has been supported by Grants-in-Aid for Scientific Research from the Ministry of  
50  
51 280 Education, Culture, Sports, Science and Technology of Japan (MEXT) (MonbuKagaku-sho); Grants-in-Aid for  
52  
53  
54 281 Scientific Research on Priority Areas of Cancer; and Grants-in-Aid for Scientific Research on Priority Areas of  
55  
56 282 Cancer Epidemiology from MEXT (Nos. 61010076, 62010074, 63010074, 1010068, 2151065, 3151064,  
57  
58 283 4151063, 5151069, 6279102, 11181101, 17015022, 18014011, 20014026, 20390156, 26293138), and JSPS  
59  
60

1  
2  
3  
4  
5  
6  
7  
8  
9  
10  
11  
12  
13  
14  
15  
16  
17  
18  
19  
20  
21  
22  
23  
24  
25  
26  
27  
28  
29  
30  
31  
32  
33  
34  
35  
36  
37  
38  
39  
40  
41  
42  
43  
44  
45  
46  
47  
48  
49  
50  
51  
52  
53  
54  
55  
56  
57  
58  
59  
60

KAKENHI No.16H06277. This research was also supported by Grant-in-Aid from the Ministry of Health, Labour and Welfare, Health and Labor Sciences research grants, Japan (Comprehensive Research on Cardiovascular Disease and Lifestyle Related Diseases: H20-Junkankitou [Seishuu]-Ippan-013; H23-Junkankitou [Seishuu]-Ippan-005); an Intramural Research Fund (22-4-5) for Cardiovascular Diseases of National Cerebral and Cardiovascular Center; Comprehensive Research on Cardiovascular Diseases and Lifestyle Related Diseases (H26-Junkankitou [Seisaku]-Ippan-001) and H29-Junkankitou [Seishuu]-Ippan-003 and 20FA1002.

**Competing interests** None declared.

**Patient and public involvement** Patients and/or the public were not involved in the design, or conduct, or reporting, or dissemination plans of this research.

**Patient consent for publication** Not required.

**Ethical approval** This study was approved by the ethics committees of Hokkaido University, Hokkaido, Japan, and Osaka University, Osaka, Japan. number/ID 14285-6.

**Provenance and peer review** Not commissioned; externally peer reviewed.

**Data availability statement** The raw/processed data required to reproduce these findings cannot be shared at this time as the data also forms part of an ongoing study.

## REFERENCES

1. Collins AL, Gleib DA, Goldman N. The role of life satisfaction and depressive symptoms in all-cause mortality. *Psychol Aging* 2009;24:696-702.
2. Koivumaa-Honkanen H, Honkanen R, Viinamaki H, *et al.* Self-reported life satisfaction and 20-year mortality in healthy Finnish adults. *Am J Epidemiol* 2000;152:983-91.
3. Steptoe A. Happiness and Health. *Annu Rev Public Health* 2019;40:339-59.
4. Shirai K, Iso H, Ohira T, *et al.* Perceived level of life enjoyment and risks of cardiovascular disease incidence and mortality: the Japan public health center-based study. *Circulation* 2009;120:956-63.
5. Rozanski A, Bavishi C, Kubzansky LD, *et al.* Association of optimism with cardiovascular events and all-cause mortality: a systematic review and meta-analysis. *JAMA Netw Open* 2019;2:e1912200.
6. Tomioka K, Kurumatani N, Hosoi H. Relationship of having hobbies and a purpose in life with mortality, activities of daily living, and instrumental activities of daily living among community-dwelling elderly adults. *J Epidemiol* 2016;26:361-70.
7. Tang M, Wang D, Guerrien A. A systematic review and meta-analysis on basic psychological need satisfaction, motivation, and well-being in later life: Contributions of self-determination theory. *Psych J* 2020;9:5-33.
8. Cohen R, Bavishi C, Rozanski A. Purpose in life and Its relationship to all-cause mortality and cardiovascular events: a meta-analysis. *Psychosom Med* 2016;78:122-33.
9. Mathews G. What Makes Life Worth Living? How Japanese and Americans Make Sense of Their Worlds. *Berkeley: University of California Press* 1996

- 1  
2  
3 332 10. Shirai K, Iso H, Fukuda H, *et al.* Factors associated with "Ikigai" among members of a public  
4  
5  
6 333 temporary employment agency for seniors (Silver Human Resources Centre) in Japan; gender  
7  
8 334 differences. *Health Qual Life Outcomes* 2006;4:12.  
9  
10  
11 335 11. Weiss RS, Bass SA, Heimovitz HK, *et al.* Japan's silver human resource centers and participant  
12  
13 336 well-being. *J Cross Cult Gerontol* 2005;20:47-66.  
14  
15  
16  
17 337 12. Sone T, Nakaya N, Ohmori K, *et al.* Sense of life worth living (ikigai) and mortality in Japan:  
18  
19 338 Ohsaki Study. *Psychosom Med* 2008;70:709-15.  
20  
21  
22 339 13. Kim ES, Sun JK, Park N, *et al.* Purpose in life and reduced incidence of stroke in older adults:  
23  
24  
25 340 'The Health and Retirement Study'. *J Psychosom Res* 2013;74:427-32.  
26  
27  
28 341 14. Roelfs DJ, Shor E, Davidson KW, *et al.* Losing life and livelihood: a systematic review and  
29  
30 342 meta-analysis of unemployment and all-cause mortality. *Soc Sci Med* 2011;72:840-54.  
31  
32  
33 343 15. Meneton P, Kesse-Guyot E, Mejean C, *et al.* Unemployment is associated with high  
34  
35  
36 344 cardiovascular event rate and increased all-cause mortality in middle-aged socially privileged  
37  
38 345 individuals. *Int Arch Occup Environ Health* 2015;88:707-16.  
39  
40  
41 346 16. Gallo WT. Evolution of research on the effect of unemployment on acute myocardial infarction  
42  
43  
44 347 risk. *Arch Intern Med* 2012;172:1737-8.  
45  
46  
47 348 17. Brenner MH. The impact of unemployment on heart disease and stroke mortality in European  
48  
49 349 Union Countries. *EU publications* 2016  
50  
51  
52 350 18. Vanthomme K, Gadeyne S. Unemployment and cause-specific mortality among the Belgian  
53  
54  
55 351 working-age population: The role of social context and gender. *PLoS One* 2019;14:e0216145.  
56  
57  
58  
59  
60

- 1  
2  
3 352 19. Janlert U. Unemployment and blood pressure in Swedish building labourers. *J Intern Med*  
4  
5 353 1992;231:241-6.  
6  
7  
8  
9 354 20. Weden MM, Astone NM, Bishai D. Racial, ethnic, and gender differences in smoking cessation  
10  
11 355 associated with employment and joblessness through young adulthood in the US. *Soc Sci*  
12  
13 356 *Med* 2006;62:303-16.  
14  
15  
16  
17 357 21. Janlert U. Unemployment as a disease and diseases of the unemployed. *Scand J Work Environ*  
18  
19 358 *Health* 1997;23 Suppl 3:79-83.  
20  
21  
22 359 22. Backhans MC, Balliu N, Lundin A, *et al.* Unemployment is a risk factor for hospitalization due  
23  
24 360 to alcohol problems: a longitudinal study based on the Stockholm Public Health Cohort  
25  
26 (SPHC). *J Stud Alcohol Drugs* 2016;77:936-42.  
27 361  
28  
29  
30 362 23. Hammarstrom A. Health consequences of youth unemployment--review from a gender  
31  
32 363 perspective. *Soc Sci Med* 1994;38:699-709.  
33  
34  
35  
36 364 24. Tamakoshi A, Ozasa K, Fujino Y, *et al.* Cohort profile of the Japan Collaborative Cohort Study  
37  
38 365 at final follow-up. *J Epidemiol* 2013;23:227-32.  
39  
40  
41 366 25. Yasukawa S, Eguchi E, Ogino K, *et al.* "Ikigai", subjective wellbeing, as a modifier of the parity-  
42  
43 367 cardiovascular mortality association- The Japan Collaborative Cohort Study. *Circ J*  
44  
45 368 2018;82:1302-08.  
46  
47  
48  
49 369 26. Tanno K, Sakata K. Psychological factors and mortality in the Japan Collaborative Cohort Study  
50  
51 370 for Evaluation of Cancer (JACC). *Asian Pac J Cancer Prev* 2007;8:113-22.  
52  
53  
54  
55 371 27. De Martinis M, Franceschi C, Monti D, *et al.* Inflammation markers predicting frailty and  
56  
57 372 mortality in the elderly. *Exp Mol Pathol* 2006;80:219-27.  
58  
59  
60

- 1  
2  
3 373 28. Harris TB, Ferrucci L, Tracy RP, *et al.* Associations of elevated interleukin-6 and C-reactive  
4  
5 374 protein levels with mortality in the elderly. *Am J Med* 1999;106:506-12.  
6  
7  
8  
9 375 29. Reuben DB, Cheh AI, Harris TB, *et al.* Peripheral blood markers of inflammation predict  
10  
11 376 mortality and functional decline in high-functioning community-dwelling older persons. *J Am*  
12  
13 377 *Geriatr Soc* 2002;50:638-44.  
14  
15  
16  
17 378 30. Zilioli S, Slatcher RB, Ong AD, *et al.* Purpose in life predicts allostatic load ten years later. *J*  
18  
19 379 *Psychosom Res* 2015;79:451-7.  
20  
21  
22 380 31. Friedman EM, Hayney M, Love GD, *et al.* Plasma interleukin-6 and soluble IL-6 receptors are  
23  
24 381 associated with psychological well-being in aging women. *Health Psychol* 2007;26:305-13.  
25  
26  
27  
28 382 32. Giltay EJ, Geleijnse JM, Zitman FG, *et al.* Dispositional optimism and all-cause and  
29  
30 383 cardiovascular mortality in a prospective cohort of elderly Dutch men and women. *Arch Gen*  
31  
32 384 *Psychiatry* 2004;61:1126-35.  
33  
34  
35  
36 385 33. Ostir GV, Markides KS, Peek MK, *et al.* The association between emotional well-being and the  
37  
38 386 incidence of stroke in older adults. *Psychosom Med* 2001;63:210-5.  
39  
40  
41 387 34. Tanno K, Sakata K, Ohsawa M, *et al.* Associations of ikigai as a positive psychological factor  
42  
43 388 with all-cause mortality and cause-specific mortality among middle-aged and elderly  
44  
45 389 Japanese people: findings from the Japan Collaborative Cohort Study. *J Psychosom Res*  
46  
47 390 2009;67:67-75.  
48  
49  
50  
51 391 35. Ryff CD. Psychological well-being revisited: advances in the science and practice of eudaimonia.  
52  
53 392 *Psychother Psychosom* 2014;83:10-28.  
54  
55  
56  
57  
58  
59  
60

- 1  
2  
3 393 36. Trudel-Fitzgerald C, Millstein RA, von Hippel C, *et al.* Psychological well-being as part of the  
4  
5 394 public health debate? Insight into dimensions, interventions, and policy. *BMC Public Health*  
6  
7 2019;19:1712.  
8 395  
9  
10  
11 396 37. Kim ES, Strecher VJ, Ryff CD. Purpose in life and use of preventive health care services. *Proc*  
12  
13 397 *Natl Acad Sci U S A* 2014;111:16331-6.  
14  
15  
16 398  
17  
18 399  
19  
20  
21  
22  
23  
24  
25  
26  
27  
28  
29  
30  
31  
32  
33  
34  
35  
36  
37  
38  
39  
40  
41  
42  
43  
44  
45  
46  
47  
48  
49  
50  
51  
52  
53  
54  
55  
56  
57  
58  
59  
60

For peer review only

**Table 1 Sex-specific mean values and proportions of baseline characteristics according to the perceived levels of *Ikigai*.**

|                                                | Men         |              |              |        | <i>P</i> <sub>Trend</sub> | Women        |              |        |                           |
|------------------------------------------------|-------------|--------------|--------------|--------|---------------------------|--------------|--------------|--------|---------------------------|
|                                                | Low         | Moderate     | High         |        |                           | Low          | Moderate     | High   | <i>P</i> <sub>Trend</sub> |
| No. at risk, n (%)                             | 2197 (7.4)  | 12240 (41.5) | 15080 (51.1) |        | 3819 (9.1)                | 20308 (48.4) | 17857 (42.5) |        |                           |
| Age, years, mean (SD)                          | 57.4 (10.5) | 57.2 (10.1)  | 56.8 (10.2)  | <0.001 | 58.1 (10.8)               | 57.7 (10.0)  | 56.8 (9.9)   | <0.001 |                           |
| Body Mass Index, kg/m <sup>2</sup> , mean (SD) | 22.5 (2.9)  | 22.5 (2.8)   | 22.8 (2.8)   | <0.001 | 23.1 (3.5)                | 22.8 (3.1)   | 23.1 (3.1)   | <0.001 |                           |
| Employment status, n (%)                       |             |              |              | <0.001 |                           |              |              | <0.001 |                           |
| Employed                                       | 560 (25.5)  | 4658 (38.1)  | 5362 (35.6)  |        | 385 (10.1)                | 2714 (13.4)  | 2550 (14.3)  |        |                           |
| Self-employed                                  | 423 (19.3)  | 3860 (31.5)  | 5669 (37.6)  |        | 367 (9.6)                 | 3137 (15.4)  | 3321 (18.6)  |        |                           |
| Part-time worker                               | 24 (1.1)    | 267 (2.2)    | 282 (1.9)    |        | 290 (7.6)                 | 1987 (9.8)   | 1779 (10.0)  |        |                           |
| Unemployed                                     | 436 (19.8)  | 2262 (18.5)  | 1802 (11.9)  |        | 894 (23.4)                | 4364 (21.5)  | 2637 (14.8)  |        |                           |
| Homemaker                                      | 2 (0.1)     | 13 (0.1)     | 9 (0.1)      |        | 685 (17.9)                | 6201 (30.5)  | 4908 (27.5)  |        |                           |
| Other                                          | 752 (34.2)  | 1180 (9.6)   | 1956 (13)    |        | 1198 (31.4)               | 1905 (9.4)   | 2662 (14.9)  |        |                           |
| Education level, n (%)                         |             |              |              | <0.001 |                           |              |              | <0.001 |                           |
| <16 years                                      | 714 (48.0)  | 4465 (39.1)  | 4079 (30.2)  |        | 1329 (49.8)               | 7686 (40.7)  | 4826 (30.6)  |        |                           |
| 16-18 years                                    | 556 (37.4)  | 5252 (46.0)  | 6515 (48.3)  |        | 1128 (42.3)               | 9580 (50.7)  | 8874 (56.3)  |        |                           |
| ≥ 19 years                                     | 217 (14.6)  | 1712 (15.0)  | 2891 (21.4)  |        | 210 (7.9)                 | 1639 (8.7)   | 2052 (13.0)  |        |                           |
| Alcohol consumption, n (%)                     |             |              |              | <0.001 |                           |              |              | <0.001 |                           |
| Never                                          | 412 (19.6)  | 2225 (19.0)  | 2514 (17.3)  |        | 2691 (77.2)               | 14305 (76.2) | 12042 (72.0) |        |                           |
| Past                                           | 221 (10.5)  | 694 (5.9)    | 738 (5.1)    |        | 97 (2.8)                  | 294 (1.6)    | 283 (1.7)    |        |                           |
| Current                                        | 1468 (69.9) | 8814 (75.1)  | 11264 (77.6) |        | 697 (20.0)                | 4173 (22.2)  | 4408 (26.3)  |        |                           |
| Smoking status, n (%)                          |             |              |              |        |                           |              |              | 0.007  |                           |
| Never                                          | 413 (19.6)  | 2322 (19.9)  | 3153 (21.8)  |        | 3053 (91.6)               | 16664 (93.5) | 14943 (93.6) |        |                           |
| Past                                           | 507 (24.1)  | 2945 (25.2)  | 3627 (25.0)  |        | 68 (2.0)                  | 253 (1.4)    | 214 (1.3)    |        |                           |
| Current                                        | 1186 (56.3) | 6416 (54.9)  | 7708 (53.2)  |        | 212 (6.4)                 | 911 (5.1)    | 814 (5.1)    |        |                           |
| Marital status, n (%)                          |             |              |              | <0.001 |                           |              |              | <0.001 |                           |
| Living with a spouse                           | 1708 (86.0) | 10358 (93.0) | 13424 (95.4) |        | 2530 (75.4)               | 15317 (83.9) | 14081 (84.8) |        |                           |
| Widowed                                        | 127 (6.4)   | 391 (3.5)    | 368 (2.6)    |        | 620 (18.5)                | 2257 (12.4)  | 2009 (12.1)  |        |                           |
| Divorced                                       | 56 (2.8)    | 182 (1.6)    | 149 (1.1)    |        | 90 (2.7)                  | 417 (2.3)    | 344 (2.1)    |        |                           |
| Single                                         | 95 (4.8)    | 210 (1.9)    | 134 (1.0)    |        | 114 (3.4)                 | 276 (1.5)    | 176 (1.1)    |        |                           |
| Sports activity time, n (%)                    |             |              |              | <0.001 |                           |              |              | <0.001 |                           |
| Never                                          | 1705 (81.2) | 8431 (72.5)  | 9060 (62.6)  |        | 3105 (86.6)               | 14951 (79.3) | 11876 (70.6) |        |                           |
| 1-2 h/w                                        | 213 (10.1)  | 1787 (15.4)  | 2807 (19.4)  |        | 272 (7.6)                 | 2343 (12.4)  | 2803 (16.7)  |        |                           |
| 3-4 h/w                                        | 108 (5.1)   | 721 (6.2)    | 1302 (9.0)   |        | 129 (3.6)                 | 851 (4.5)    | 1188 (7.1)   |        |                           |
| ≥5 h/w                                         | 73 (3.5)    | 687 (5.9)    | 1307 (9.0)   |        | 79 (2.2)                  | 720 (3.8)    | 956 (5.7)    |        |                           |
| Walking time, n (%)                            |             |              |              | <0.001 |                           |              |              | <.0001 |                           |



|  |                                         |             |             |             |        |             |              |              |        |
|--|-----------------------------------------|-------------|-------------|-------------|--------|-------------|--------------|--------------|--------|
|  | Never                                   | 294 (18.8)  | 1354 (11.6) | 1307 (9.5)  |        | 390 (14.3)  | 1852 (9.7)   | 1221 (7.7)   |        |
|  | 0.5 h/day                               | 302 (19.3)  | 2268 (19.4) | 2453 (17.8) |        | 525 (19.3)  | 3444 (18.0)  | 2596 (16.4)  |        |
|  | 0.5-1 h/day                             | 271 (17.3)  | 2339 (20.0) | 2788 (20.3) |        | 558 (20.5)  | 4198 (21.9)  | 3249 (20.5)  |        |
|  | ≥1 h/day                                | 695 (44.5)  | 5757 (49.1) | 7195 (52.4) |        | 1246 (45.8) | 9690 (50.5)  | 8777 (55.4)  |        |
|  | Sleep duration, hour per day, mean (SD) | 7.6 (1.3)   | 7.5 (1.1)   | 7.4 (1.1)   | 0.009  | 7.2 (1.3)   | 7.1 (1.1)    | 7.1 (1.0)    | 0.008  |
|  | Perceived mental stress, n (%)          |             |             |             | <0.001 |             |              |              | <0.001 |
|  | Low                                     | 378 (17.7)  | 1382 (11.4) | 3107 (20.9) |        | 541 (14.6)  | 2319 (11.6)  | 4300 (24.4)  |        |
|  | Moderate                                | 1029 (48.1) | 8237 (68.2) | 8332 (55.9) |        | 1838 (49.8) | 13907 (69.8) | 10169 (57.6) |        |
|  | High                                    | 733 (34.3)  | 2451 (20.3) | 3458 (23.2) |        | 1315 (35.6) | 3699 (18.6)  | 3184 (18.0)  |        |
|  | Sense of life enjoyment, n (%)          |             |             |             | <0.001 |             |              |              | <0.001 |
|  | Low                                     | 417 (19.2)  | 399 (3.3)   | 193 (1.3)   |        | 775 (20.7)  | 686 (3.4)    | 184 (1.0)    |        |
|  | Moderate                                | 965 (44.4)  | 9101 (75.0) | 5612 (37.5) |        | 1753 (46.7) | 15044 (75.2) | 5937 (33.5)  |        |
|  | High                                    | 230 (10.6)  | 2640 (21.7) | 8265 (55.2) |        | 315 (8.4)   | 4288 (21.4)  | 10234 (57.8) |        |
|  | History of hypertension, n (%)          | 485 (24.7)  | 2305 (20.5) | 2698 (19.2) | 0.050  | 975 (28.0)  | 4107 (22.3)  | 3433 (20.8)  | 0.188  |
|  | History of diabetes mellitus, n (%)     | 153 (8.1)   | 729 (6.6)   | 895 (6.5)   | 0.888  | 197 (5.9)   | 735 (4.1)    | 566 (3.5)    | 0.062  |

SD : Standard deviation

**Table 2 Sex-specific, age-adjusted, and multivariable hazard ratios (HRs) and 95% confidence intervals (CIs) of total cardiovascular mortality according to the perceived levels of *Ikigai*, stratified by employment status.**

|                            | Men   |                            |                            |                  | Women |                            |                            |                  |
|----------------------------|-------|----------------------------|----------------------------|------------------|-------|----------------------------|----------------------------|------------------|
|                            | Low   | Moderate                   | High                       | $P_{Trend}$      | Low   | Moderate                   | High                       | $P_{Trend}$      |
| <b>All</b>                 |       |                            |                            |                  |       |                            |                            |                  |
| No. at risk                | 2197  | 12240                      | 15080                      |                  | 3819  | 20308                      | 17857                      |                  |
| No. of person-years        | 32824 | 191424                     | 244694                     |                  | 61744 | 330980                     | 298982                     |                  |
| No. of deaths              | 251   | 1007                       | 1135                       |                  | 307   | 1129                       | 851                        |                  |
| Age-adjusted HR (95%CI)    | 1.00  | <b>0.66 (0.58 to 0.76)</b> | <b>0.57 (0.50 to 0.65)</b> | <b>&lt;0.001</b> | 1.00  | <b>0.75 (0.66 to 0.86)</b> | <b>0.68 (0.60 to 0.78)</b> | <b>&lt;0.001</b> |
| Multivariable * HR (95%CI) | 1.00  | <b>0.80 (0.68 to 0.93)</b> | <b>0.74 (0.64 to 0.87)</b> | <b>&lt;0.001</b> | 1.00  | 0.87 (0.75 to 1.00)        | 0.88 (0.76 to 1.03)        | 0.136            |
| <b>Employed</b>            |       |                            |                            |                  |       |                            |                            |                  |
| No. at risk                | 560   | 4658                       | 5362                       |                  | 385   | 2714                       | 2550                       |                  |
| No. of person-years        | 9479  | 80287                      | 92997                      |                  | 6695  | 48860                      | 46328                      |                  |
| No. of deaths              | 22    | 193                        | 192                        |                  | 7     | 43                         | 44                         |                  |

|    |                            |       |                            |                            |                  |       |                            |                            |                  |
|----|----------------------------|-------|----------------------------|----------------------------|------------------|-------|----------------------------|----------------------------|------------------|
| 1  | Age-adjusted HR (95%CI)    | 1.00  | 0.92 (0.59 to 1.44)        | 0.73 (0.47 to 1.14)        | 0.051            | 1.00  | 0.85 (0.38 to 1.89)        | 0.89 (0.40 to 1.97)        | 0.916            |
| 2  | Multivariable * HR (95%CI) | 1.00  | 1.02 (0.63 to 1.63)        | 0.80 (0.49 to 1.31)        | 0.116            | 1.00  | 0.82 (0.35 to 1.95)        | 1.01 (0.41 to 2.48)        | 0.679            |
| 3  | <b>Self-employed</b>       |       |                            |                            |                  |       |                            |                            |                  |
| 4  | No. at risk                | 423   | 3860                       | 5669                       |                  | 367   | 3137                       | 3321                       |                  |
| 5  | No. of person-years        | 6347  | 61848                      | 93546                      |                  | 6025  | 53663                      | 56797                      |                  |
| 6  | No. of deaths              | 35    | 290                        | 425                        |                  | 9     | 113                        | 102                        |                  |
| 7  | Age-adjusted HR (95%CI)    | 1.00  | 0.76 (0.54 to 1.08)        | 0.71 (0.50 to 1.00)        | 0.120            | 1.00  | 1.14 (0.58 to 2.25)        | 0.98 (0.50 to 1.94)        | 0.523            |
| 8  | Multivariable * HR (95%CI) | 1.00  | 0.86 (0.60 to 1.24)        | 0.85 (0.59 to 1.22)        | 0.682            | 1.00  | 1.30 (0.62 to 2.73)        | 1.29 (0.60 to 2.76)        | 0.782            |
| 9  | <b>Part-time workers</b>   |       |                            |                            |                  |       |                            |                            |                  |
| 10 | No. at risk                | 24    | 267                        | 282                        |                  | 290   | 1987                       | 1779                       |                  |
| 11 | No. of person-years        | 336   | 4037                       | 4344                       |                  | 4941  | 34182                      | 30244                      |                  |
| 12 | No. of deaths              | 2     | 27                         | 24                         |                  | 7     | 28                         | 33                         |                  |
| 13 | Age-adjusted HR (95%CI)    | 1.00  | 0.78 (0.18 to 3.28)        | 0.51 (0.12 to 2.20)        | 0.287            | 1.00  | 0.55 (0.24 to 1.25)        | 0.73 (0.32 to 1.65)        | 0.279            |
| 14 | Multivariable * HR (95%CI) | 1.00  | 0.91 (0.17 to 4.76)        | 0.70 (0.12 to 4.06)        | 0.762            | 1.00  | 0.88 (0.34 to 2.25)        | 0.79 (0.30 to 2.04)        | 0.866            |
| 15 | <b>Homemakers</b>          |       |                            |                            |                  |       |                            |                            |                  |
| 16 | No. at risk                | 2     | 13                         | 9                          |                  | 685   | 6201                       | 4908                       |                  |
| 17 | No. of person-years        | 33    | 164                        | 137                        |                  | 10963 | 100252                     | 80823                      |                  |
| 18 | No. of deaths              | 0     | 0                          | 0                          |                  | 46    | 266                        | 184                        |                  |
| 19 | Age-adjusted HR (95%CI)    | -     | -                          | -                          | -                | 1.00  | <b>0.67 (0.49 to 0.91)</b> | <b>0.57 (0.41 to 0.78)</b> | <b>0.003</b>     |
| 20 | Multivariable * HR (95%CI) | -     | -                          | -                          | -                | 1.00  | 0.83 (0.59 to 1.17)        | 0.84 (0.58 to 1.22)        | 0.576            |
| 21 | <b>Unemployed</b>          |       |                            |                            |                  |       |                            |                            |                  |
| 22 | No. at risk                | 436   | 2262                       | 1802                       |                  | 894   | 4364                       | 2637                       |                  |
| 23 | No. of person-years        | 4821  | 27595                      | 23334                      |                  | 11864 | 62898                      | 38599                      |                  |
| 24 | No. of deaths              | 84    | 368                        | 250                        |                  | 145   | 555                        | 306                        |                  |
| 25 | Age-adjusted HR (95%CI)    | 1.00  | <b>0.63 (0.50 to 0.80)</b> | <b>0.48 (0.37 to 0.61)</b> | <b>&lt;0.001</b> | 1.00  | <b>0.70 (0.58 to 0.84)</b> | <b>0.62 (0.51 to 0.76)</b> | <b>&lt;0.001</b> |
| 26 | Multivariable * HR (95%CI) | 1.00  | <b>0.74 (0.57 to 0.97)</b> | <b>0.69 (0.52 to 0.93)</b> | <b>0.044</b>     | 1.00  | <b>0.78 (0.64 to 0.95)</b> | <b>0.77 (0.61 to 0.97)</b> | <b>0.039</b>     |
| 27 | <b>Others</b>              |       |                            |                            |                  |       |                            |                            |                  |
| 28 | No. at risk                | 752   | 1180                       | 1956                       |                  | 1198  | 1905                       | 2662                       |                  |
| 29 | No. of person-years        | 11808 | 17493                      | 30335                      |                  | 21257 | 31124                      | 46191                      |                  |
| 30 | No. of deaths              | 108   | 129                        | 244                        |                  | 93    | 124                        | 182                        |                  |
| 31 | Age-adjusted HR (95%CI)    | 1.00  | <b>0.62 (0.48 to 0.80)</b> | <b>0.67 (0.53 to 0.84)</b> | <b>&lt;0.001</b> | 1.00  | 0.81 (0.62 to 1.06)        | 0.83 (0.65 to 1.06)        | 0.253            |
| 32 | Multivariable * HR (95%CI) | 1.00  | <b>0.64 (0.47 to 0.87)</b> | <b>0.76 (0.59 to 0.97)</b> | <b>0.016</b>     | 1.00  | 0.91 (0.64 to 1.29)        | 1.00 (0.76 to 1.31)        | 0.813            |

\* Adjusted for age, body mass index, smoking status, alcohol consumption, sports activity, walking time, sleep duration, education level, employment status, marital status, sense of life enjoyment, perceived mental stress, medical history of hypertension, and diabetes mellitus.

**Table 3 Sex-specific, multivariable hazard ratios (HRs) and 95% confidence intervals (CIs) of total cardiovascular mortality according to the perceived levels of *Ikigai* after exclusion of deaths occurred 1 to 5 years from the baseline among unemployed persons.**

|              |                            | <i>Ikigai</i> |                            |                            | <i>P</i> <sub>Trend</sub> |
|--------------|----------------------------|---------------|----------------------------|----------------------------|---------------------------|
|              |                            | Low           | Moderate                   | High                       |                           |
| <b>Men</b>   |                            |               |                            |                            |                           |
|              | At risk                    | 436           | 2262                       | 1802                       |                           |
|              | Person-years               | 4821          | 27595                      | 23334                      |                           |
|              | No. of deaths              | 84            | 368                        | 250                        |                           |
|              | Multivariable HR           | 1.00          | <b>0.74 (0.57 to 0.97)</b> | <b>0.69 (0.52 to 0.93)</b> | <b>0.044</b>              |
|              |                            | 79            | 358                        | 243                        |                           |
|              | Deaths within 1 y exclude  | 1.00          | <b>0.74 (0.56 to 0.97)</b> | <b>0.68 (0.51 to 0.92)</b> | <b>0.044</b>              |
|              |                            | 73            | 343                        | 232                        |                           |
|              | Deaths within 2 y exclude  | 1.00          | 0.77 (0.58 to 1.02)        | <b>0.71 (0.52 to 0.96)</b> | 0.087                     |
|              |                            | 67            | 318                        | 223                        |                           |
|              | Deaths within 3 y exclude  | 1.00          | 0.75 (0.56 to 1.01)        | <b>0.71 (0.52 to 0.98)</b> | 0.104                     |
|              |                            | 60            | 299                        | 210                        |                           |
|              | Deaths within 4 y exclude  | 1.00          | 0.78 (0.57 to 1.06)        | 0.72 (0.52 to 1.01)        | 0.157                     |
|              |                            | 56            | 282                        | 201                        |                           |
|              | Deaths within 5 y exclude  | 1.00          | 0.75 (0.55 to 1.04)        | <b>0.69 (0.49 to 0.98)</b> | 0.115                     |
|              |                            |               |                            |                            |                           |
| <b>Women</b> |                            |               |                            |                            |                           |
|              | No. at risk                | 894           | 4364                       | 2637                       |                           |
|              | No. of person-years        | 11864         | 62898                      | 38599                      |                           |
|              | No. of deaths              | 145           | 555                        | 306                        |                           |
|              | Multivariable HR           | 1.00          | <b>0.78 (0.64 to 0.95)</b> | <b>0.77 (0.61 to 0.97)</b> | <b>0.039</b>              |
|              |                            | 138           | 540                        | 299                        |                           |
|              | Deaths within 1 y excluded | 1.00          | <b>0.78 (0.64 to 0.96)</b> | <b>0.78 (0.62 to 0.98)</b> | 0.056                     |
|              |                            | 134           | 526                        | 290                        |                           |
|              | Deaths within 2 y excluded | 1.00          | <b>0.79 (0.64 to 0.97)</b> | <b>0.78 (0.61 to 0.98)</b> | 0.061                     |
|              |                            | 125           | 498                        | 281                        |                           |
|              | Deaths within 3 y excluded | 1.00          | <b>0.77 (0.62 to 0.96)</b> | 0.78 (0.61 to 1.00)        | 0.057                     |
|              |                            | 113           | 480                        | 273                        |                           |

|                            |      |                            |                     |       |
|----------------------------|------|----------------------------|---------------------|-------|
| Deaths within 4 y excluded | 1.00 | 0.81 (0.65 to 1.02)        | 0.83 (0.65 to 1.08) | 0.193 |
|                            | 112  | 462                        | 267                 |       |
| Deaths within 5 y excluded | 1.00 | <b>0.78 (0.62 to 0.97)</b> | 0.80 (0.62 to 1.04) | 0.092 |

\* Adjusted for age, body mass index, smoking status, alcohol consumption, sports activity, walking time, sleep duration, education level, employment status, marital status, sense of life enjoyment, perceived mental stress, medical history of hypertension, and diabetes mellitus.

**Table 4 Age- and sex-adjusted and multivariable hazard ratios (HRs) and 95 % confidence intervals (CIs) of mortality from type-specific cardiovascular diseases according to the perceived levels of *Ikigai* among unemployed persons.**

|                                    |                                | <i>Ikigai</i> |                            |                            | <i>P</i> <sub>Trend</sub> |
|------------------------------------|--------------------------------|---------------|----------------------------|----------------------------|---------------------------|
|                                    |                                | Low           | Moderate                   | High                       |                           |
|                                    | No. at risk                    | 1330          | 6626                       | 4439                       |                           |
|                                    | No. of person-years            | 16684         | 90493                      | 61933                      |                           |
| <b>Total stroke</b>                | No. of deaths                  | 107           | 375                        | 242                        |                           |
|                                    | Age-, sex-adjusted HR (95%CI)  | 1.00          | <b>0.58 (0.47 to 0.72)</b> | <b>0.51 (0.41 to 0.65)</b> | <b>&lt;0.001</b>          |
|                                    | Multivariable * HR (95%CI)     | 1.00          | <b>0.72 (0.57 to 0.91)</b> | <b>0.74 (0.56 to 0.96)</b> | <b>0.022</b>              |
| <b>Ischemic stroke</b>             | No. of deaths                  | 37            | 157                        | 91                         |                           |
|                                    | Age-, sex- adjusted HR (95%CI) | 1.00          | 0.70 (0.49 to 1.00)        | <b>0.54 (0.37 to 0.80)</b> | <b>0.007</b>              |
|                                    | Multivariable * HR (95%CI)     | 1.00          | 0.82 (0.56 to 1.20)        | 0.80 (0.51 to 1.24)        | 0.555                     |
| <b>Hemorrhagic stroke</b>          | No. of deaths                  | 30            | 95                         | 67                         |                           |
|                                    | Age-, sex- adjusted HR (95%CI) | 1.00          | <b>0.54 (0.36 to 0.82)</b> | <b>0.54 (0.35 to 0.83)</b> | <b>0.008</b>              |
|                                    | Multivariable * HR (95%CI)     | 1.00          | 0.74 (0.47 to 1.19)        | 0.84 (0.49 to 1.42)        | 0.425                     |
| <b>Stroke of undetermined type</b> | No. of deaths                  | 40            | 123                        | 84                         |                           |
|                                    | Age-, sex- adjusted HR (95%CI) | 1.00          | <b>0.51 (0.36 to 0.73)</b> | <b>0.47 (0.32 to 0.69)</b> | <b>&lt;0.001</b>          |
|                                    | Multivariable * HR (95%CI)     | 1.00          | <b>0.61 (0.41 to 0.90)</b> | <b>0.61 (0.39 to 0.96)</b> | <b>0.041</b>              |
| <b>Coronary heart disease</b>      | No. of deaths                  | 43            | 196                        | 99                         |                           |
|                                    | Age-, sex- adjusted HR (95%CI) | 1.00          | 0.75 (0.54 to 1.05)        | <b>0.51 (0.36 to 0.74)</b> | <b>&lt;0.001</b>          |

|                      |                                |      |                     |                            |              |
|----------------------|--------------------------------|------|---------------------|----------------------------|--------------|
|                      | Multivariable * HR (95%CI)     | 1.00 | 0.77 (0.54 to 1.10) | <b>0.64 (0.43 to 0.97)</b> | 0.103        |
| <b>Heart failure</b> | No. of deaths                  | 43   | 187                 | 120                        |              |
|                      | Age-, sex- adjusted HR (95%CI) | 1.00 | 0.73 (0.52 to 1.01) | <b>0.65 (0.46 to 0.92)</b> | 0.055        |
|                      | Multivariable * HR (95%CI)     | 1.00 | 0.90 (0.63 to 1.30) | 1.01 (0.67 to 1.52)        | 0.663        |
| <b>Other CVDs</b>    | No. of deaths                  | 36   | 165                 | 95                         | .            |
|                      | Age-, sex- adjusted HR (95%CI) | 1.00 | 0.75 (0.52 to 1.08) | <b>0.60 (0.40 to 0.87)</b> | <b>0.023</b> |
|                      | Multivariable * HR (95%CI)     | 1.00 | 0.75 (0.51 to 1.11) | 0.64 (0.42 to 1.00)        | 0.144        |

\* Adjusted for age, sex, body mass index, smoking status, alcohol consumption, sports activity, walking time, sleep duration, education level, employment status, marital status, sense of life enjoyment, perceived mental stress, medical history of hypertension, and diabetes mellitus.

#### Figure legends

Figure 1 Flowchart for the selection of the study subjects.

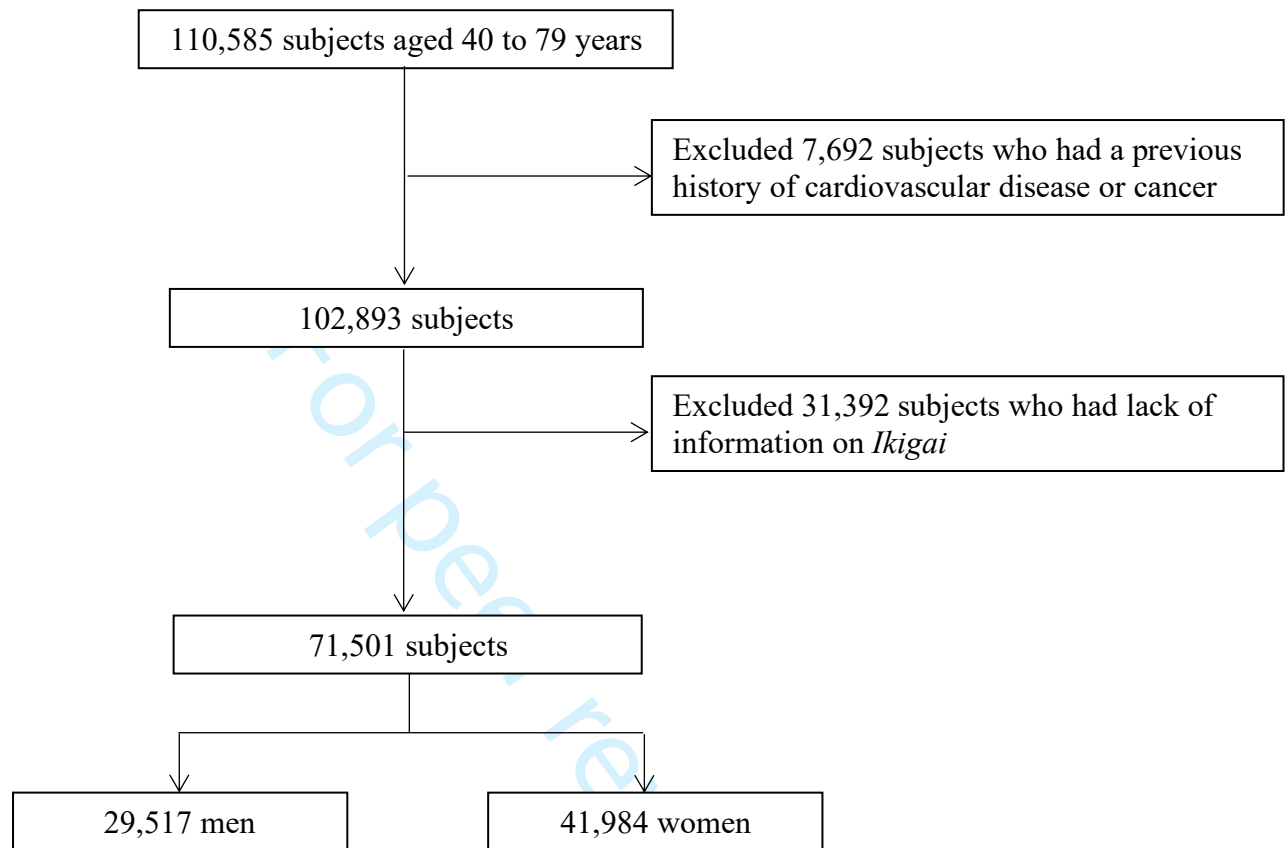

Figure 1 Flowchart for the selection of the study subjects.

# Reporting checklist for cohort study.

Based on the STROBE cohort guidelines.

## Instructions to authors

Complete this checklist by entering the page numbers from your manuscript where readers will find each of the items listed below.

Your article may not currently address all the items on the checklist. Please modify your text to include the missing information. If you are certain that an item does not apply, please write "n/a" and provide a short explanation.

Upload your completed checklist as an extra file when you submit to a journal.

In your methods section, say that you used the STROBE cohort reporting guidelines, and cite them as:

von Elm E, Altman DG, Egger M, Pocock SJ, Gøtzsche PC, Vandenbroucke JP. The Strengthening of Reporting of Observational Studies in Epidemiology (STROBE) Statement: guidelines for reporting observational studies.

|                           |                     | Reporting Item                                                                                                                  | Page Number |
|---------------------------|---------------------|---------------------------------------------------------------------------------------------------------------------------------|-------------|
| <b>Title and abstract</b> |                     |                                                                                                                                 |             |
| Title                     | <a href="#">#1a</a> | Indicate the study's design with a commonly used term in the title or the abstract                                              | 1           |
| Abstract                  | <a href="#">#1b</a> | Provide in the abstract an informative and balanced summary of what was done and what was found                                 | 3           |
| <b>Introduction</b>       |                     |                                                                                                                                 |             |
| Background / rationale    | <a href="#">#2</a>  | Explain the scientific background and rationale for the investigation being reported                                            | 5-6         |
| Objectives                | <a href="#">#3</a>  | State specific objectives, including any prespecified hypotheses                                                                | 6           |
| <b>Methods</b>            |                     |                                                                                                                                 |             |
| Study design              | <a href="#">#4</a>  | Present key elements of study design early in the paper                                                                         | 6-7         |
| Setting                   | <a href="#">#5</a>  | Describe the setting, locations, and relevant dates, including periods of recruitment, exposure, follow-up, and data collection | 6-7         |

|    |                      |                      |                                                                                                                                                                                                                                                                                |     |
|----|----------------------|----------------------|--------------------------------------------------------------------------------------------------------------------------------------------------------------------------------------------------------------------------------------------------------------------------------|-----|
| 1  | Eligibility criteria | <a href="#">#6a</a>  | Give the eligibility criteria, and the sources and methods of selection of participants. Describe methods of follow-up.                                                                                                                                                        | 6-7 |
| 2  |                      |                      |                                                                                                                                                                                                                                                                                |     |
| 3  |                      |                      |                                                                                                                                                                                                                                                                                |     |
| 4  | Eligibility criteria | <a href="#">#6b</a>  | For matched studies, give matching criteria and number of exposed and unexposed                                                                                                                                                                                                | 6-7 |
| 5  |                      |                      |                                                                                                                                                                                                                                                                                |     |
| 6  |                      |                      |                                                                                                                                                                                                                                                                                |     |
| 7  |                      |                      |                                                                                                                                                                                                                                                                                |     |
| 8  | Variables            | <a href="#">#7</a>   | Clearly define all outcomes, exposures, predictors, potential confounders, and effect modifiers. Give diagnostic criteria, if applicable                                                                                                                                       | 7   |
| 9  |                      |                      |                                                                                                                                                                                                                                                                                |     |
| 10 |                      |                      |                                                                                                                                                                                                                                                                                |     |
| 11 |                      |                      |                                                                                                                                                                                                                                                                                |     |
| 12 |                      |                      |                                                                                                                                                                                                                                                                                |     |
| 13 |                      |                      |                                                                                                                                                                                                                                                                                |     |
| 14 | Data sources /       | <a href="#">#8</a>   | For each variable of interest give sources of data and details of methods of assessment (measurement). Describe comparability of assessment methods if there is more than one group. Give information separately for for exposed and unexposed groups if applicable.           | 7   |
| 15 | measurement          |                      |                                                                                                                                                                                                                                                                                |     |
| 16 |                      |                      |                                                                                                                                                                                                                                                                                |     |
| 17 |                      |                      |                                                                                                                                                                                                                                                                                |     |
| 18 |                      |                      |                                                                                                                                                                                                                                                                                |     |
| 19 |                      |                      |                                                                                                                                                                                                                                                                                |     |
| 20 |                      |                      |                                                                                                                                                                                                                                                                                |     |
| 21 |                      |                      |                                                                                                                                                                                                                                                                                |     |
| 22 | Bias                 | <a href="#">#9</a>   | Describe any efforts to address potential sources of bias                                                                                                                                                                                                                      | 7   |
| 23 |                      |                      |                                                                                                                                                                                                                                                                                |     |
| 24 | Study size           | <a href="#">#10</a>  | Explain how the study size was arrived at                                                                                                                                                                                                                                      | 7   |
| 25 |                      |                      |                                                                                                                                                                                                                                                                                |     |
| 26 |                      |                      |                                                                                                                                                                                                                                                                                |     |
| 27 | Quantitative         | <a href="#">#11</a>  | Explain how quantitative variables were handled in the analyses. If applicable, describe which groupings were chosen, and why                                                                                                                                                  | 8   |
| 28 | variables            |                      |                                                                                                                                                                                                                                                                                |     |
| 29 |                      |                      |                                                                                                                                                                                                                                                                                |     |
| 30 |                      |                      |                                                                                                                                                                                                                                                                                |     |
| 31 | Statistical methods  | <a href="#">#12a</a> | Describe all statistical methods, including those used to control for confounding                                                                                                                                                                                              | 7-8 |
| 32 |                      |                      |                                                                                                                                                                                                                                                                                |     |
| 33 |                      |                      |                                                                                                                                                                                                                                                                                |     |
| 34 | Statistical methods  | <a href="#">#12b</a> | Describe any methods used to examine subgroups and interactions                                                                                                                                                                                                                | 7-8 |
| 35 |                      |                      |                                                                                                                                                                                                                                                                                |     |
| 36 |                      |                      |                                                                                                                                                                                                                                                                                |     |
| 37 | Statistical methods  | <a href="#">#12c</a> | Explain how missing data were addressed                                                                                                                                                                                                                                        | 8   |
| 38 |                      |                      |                                                                                                                                                                                                                                                                                |     |
| 39 | Statistical methods  | <a href="#">#12d</a> | If applicable, explain how loss to follow-up was addressed                                                                                                                                                                                                                     | 8   |
| 40 |                      |                      |                                                                                                                                                                                                                                                                                |     |
| 41 | Statistical methods  | <a href="#">#12e</a> | Describe any sensitivity analyses                                                                                                                                                                                                                                              | 8   |
| 42 |                      |                      |                                                                                                                                                                                                                                                                                |     |
| 43 |                      |                      |                                                                                                                                                                                                                                                                                |     |
| 44 | <b>Results</b>       |                      |                                                                                                                                                                                                                                                                                |     |
| 45 |                      |                      |                                                                                                                                                                                                                                                                                |     |
| 46 | Participants         | <a href="#">#13a</a> | Report numbers of individuals at each stage of study—eg numbers potentially eligible, examined for eligibility, confirmed eligible, included in the study, completing follow-up, and analysed. Give information separately for for exposed and unexposed groups if applicable. | 9   |
| 47 |                      |                      |                                                                                                                                                                                                                                                                                |     |
| 48 |                      |                      |                                                                                                                                                                                                                                                                                |     |
| 49 |                      |                      |                                                                                                                                                                                                                                                                                |     |
| 50 |                      |                      |                                                                                                                                                                                                                                                                                |     |
| 51 |                      |                      |                                                                                                                                                                                                                                                                                |     |
| 52 |                      |                      |                                                                                                                                                                                                                                                                                |     |
| 53 |                      |                      |                                                                                                                                                                                                                                                                                |     |
| 54 | Participants         | <a href="#">#13b</a> | Give reasons for non-participation at each stage                                                                                                                                                                                                                               | 9   |
| 55 |                      |                      |                                                                                                                                                                                                                                                                                |     |
| 56 |                      |                      |                                                                                                                                                                                                                                                                                |     |
| 57 | Participants         | <a href="#">#13c</a> | Consider use of a flow diagram                                                                                                                                                                                                                                                 | 6   |
| 58 |                      |                      |                                                                                                                                                                                                                                                                                |     |
| 59 |                      |                      |                                                                                                                                                                                                                                                                                |     |
| 60 |                      |                      |                                                                                                                                                                                                                                                                                |     |



|    |                          |                      |                                                                                                                                                                                                                   |          |
|----|--------------------------|----------------------|-------------------------------------------------------------------------------------------------------------------------------------------------------------------------------------------------------------------|----------|
| 1  | Descriptive data         | <a href="#">#14a</a> | Give characteristics of study participants (eg demographic, clinical, social) and information on exposures and potential confounders. Give information separately for exposed and unexposed groups if applicable. | 9, 20-21 |
| 2  |                          |                      |                                                                                                                                                                                                                   |          |
| 3  |                          |                      |                                                                                                                                                                                                                   |          |
| 4  |                          |                      |                                                                                                                                                                                                                   |          |
| 5  |                          |                      |                                                                                                                                                                                                                   |          |
| 6  |                          |                      |                                                                                                                                                                                                                   |          |
| 7  |                          |                      |                                                                                                                                                                                                                   |          |
| 8  | Descriptive data         | <a href="#">#14b</a> | Indicate number of participants with missing data for each variable of interest                                                                                                                                   | 6        |
| 9  |                          |                      |                                                                                                                                                                                                                   |          |
| 10 |                          |                      |                                                                                                                                                                                                                   |          |
| 11 | Descriptive data         | <a href="#">#14c</a> | Summarise follow-up time (eg, average and total amount)                                                                                                                                                           | 7        |
| 12 |                          |                      |                                                                                                                                                                                                                   |          |
| 13 |                          |                      |                                                                                                                                                                                                                   |          |
| 14 | Outcome data             | <a href="#">#15</a>  | Report numbers of outcome events or summary measures over time. Give information separately for exposed and unexposed groups if applicable.                                                                       | 9        |
| 15 |                          |                      |                                                                                                                                                                                                                   |          |
| 16 |                          |                      |                                                                                                                                                                                                                   |          |
| 17 |                          |                      |                                                                                                                                                                                                                   |          |
| 18 |                          |                      |                                                                                                                                                                                                                   |          |
| 19 | Main results             | <a href="#">#16a</a> | Give unadjusted estimates and, if applicable, confounder-adjusted estimates and their precision (eg, 95% confidence interval). Make clear which confounders were adjusted for and why they were included          | 9-10     |
| 20 |                          |                      |                                                                                                                                                                                                                   |          |
| 21 |                          |                      |                                                                                                                                                                                                                   |          |
| 22 |                          |                      |                                                                                                                                                                                                                   |          |
| 23 |                          |                      |                                                                                                                                                                                                                   |          |
| 24 |                          |                      |                                                                                                                                                                                                                   |          |
| 25 |                          |                      |                                                                                                                                                                                                                   |          |
| 26 | Main results             | <a href="#">#16b</a> | Report category boundaries when continuous variables were categorized                                                                                                                                             | 7-9      |
| 27 |                          |                      |                                                                                                                                                                                                                   |          |
| 28 |                          |                      |                                                                                                                                                                                                                   |          |
| 29 |                          |                      |                                                                                                                                                                                                                   |          |
| 30 | Main results             | <a href="#">#16c</a> | If relevant, consider translating estimates of relative risk into absolute risk for a meaningful time period                                                                                                      | 9-10     |
| 31 |                          |                      |                                                                                                                                                                                                                   |          |
| 32 |                          |                      |                                                                                                                                                                                                                   |          |
| 33 |                          |                      |                                                                                                                                                                                                                   |          |
| 34 | Other analyses           | <a href="#">#17</a>  | Report other analyses done—eg analyses of subgroups and interactions, and sensitivity analyses                                                                                                                    | 10       |
| 35 |                          |                      |                                                                                                                                                                                                                   |          |
| 36 |                          |                      |                                                                                                                                                                                                                   |          |
| 37 |                          |                      |                                                                                                                                                                                                                   |          |
| 38 | <b>Discussion</b>        |                      |                                                                                                                                                                                                                   |          |
| 39 |                          |                      |                                                                                                                                                                                                                   |          |
| 40 | Key results              | <a href="#">#18</a>  | Summarise key results with reference to study objectives                                                                                                                                                          | 10       |
| 41 |                          |                      |                                                                                                                                                                                                                   |          |
| 42 | Limitations              | <a href="#">#19</a>  | Discuss limitations of the study, taking into account sources of potential bias or imprecision. Discuss both direction and magnitude of any potential bias.                                                       | 11-12    |
| 43 |                          |                      |                                                                                                                                                                                                                   |          |
| 44 |                          |                      |                                                                                                                                                                                                                   |          |
| 45 |                          |                      |                                                                                                                                                                                                                   |          |
| 46 |                          |                      |                                                                                                                                                                                                                   |          |
| 47 | Interpretation           | <a href="#">#20</a>  | Give a cautious overall interpretation considering objectives, limitations, multiplicity of analyses, results from similar studies, and other relevant evidence.                                                  | 10-11    |
| 48 |                          |                      |                                                                                                                                                                                                                   |          |
| 49 |                          |                      |                                                                                                                                                                                                                   |          |
| 50 |                          |                      |                                                                                                                                                                                                                   |          |
| 51 |                          |                      |                                                                                                                                                                                                                   |          |
| 52 |                          |                      |                                                                                                                                                                                                                   |          |
| 53 | Generalisability         | <a href="#">#21</a>  | Discuss the generalisability (external validity) of the study results                                                                                                                                             | 11-12    |
| 54 |                          |                      |                                                                                                                                                                                                                   |          |
| 55 | <b>Other Information</b> |                      |                                                                                                                                                                                                                   |          |
| 56 |                          |                      |                                                                                                                                                                                                                   |          |
| 57 |                          |                      |                                                                                                                                                                                                                   |          |
| 58 |                          |                      |                                                                                                                                                                                                                   |          |
| 59 |                          |                      |                                                                                                                                                                                                                   |          |
| 60 |                          |                      |                                                                                                                                                                                                                   |          |

1 Funding #22 Give the source of funding and the role of the funders for the 13-14  
2 present study and, if applicable, for the original study on which  
3 the present article is based  
4  
5

6 The STROBE checklist is distributed under the terms of the Creative Commons Attribution License CC-BY.  
7 This checklist was completed on 29. November 2021 using <https://www.goodreports.org/>, a tool made by the  
8 EQUATOR Network in collaboration with [Penelope.ai](https://www.penelope.ai)  
9  
10  
11  
12  
13  
14  
15  
16  
17  
18  
19  
20  
21  
22  
23  
24  
25  
26  
27  
28  
29  
30  
31  
32  
33  
34  
35  
36  
37  
38  
39  
40  
41  
42  
43  
44  
45  
46  
47  
48  
49  
50  
51  
52  
53  
54  
55  
56  
57  
58  
59  
60
